# Supplementary material for: Ampere-level CO2reduction to multicarbon products over a copper gas penetration electrode
Source: Royal Society of Chemistry journal article supplement (doi:10.1039/d2ee02121h), 2022-01-01
Supplement: d2ee02121h1.pdf [file d2ee02121h1.pdf]

## Electronic Supplementary Information for

### **Ampere-level CO<sub>2</sub> reduction to multicarbon products over a copper gas penetration electrode†**

Chang Zhu,<sup>ab</sup> Yanfang Song,<sup>ab</sup> Xiao Dong,<sup>a</sup> Guihua Li,<sup>ab</sup> Aohui Chen,<sup>ac</sup> Wei Chen,<sup>\*ab</sup> Gangfeng Wu,<sup>ab</sup> Shoujie Li,<sup>ac</sup> Wei Wei,<sup>\*abc</sup> Yuhan Sun<sup>\*abc</sup>

<sup>a</sup> CAS Key Laboratory of Low-Carbon Conversion Science and Engineering, Shanghai Advanced Research Institute, Chinese Academy of Sciences, Shanghai 201210, P.R. China

<sup>b</sup> University of Chinese Academy of Sciences, Beijing 100049, P.R. China

<sup>c</sup> School of Physical Science and Technology, ShanghaiTech University, Shanghai 201210, P.R. China

\* E-mail: chenw@sari.ac.cn, weiwei@sari.ac.cn, sunyh@sari.ac.cn

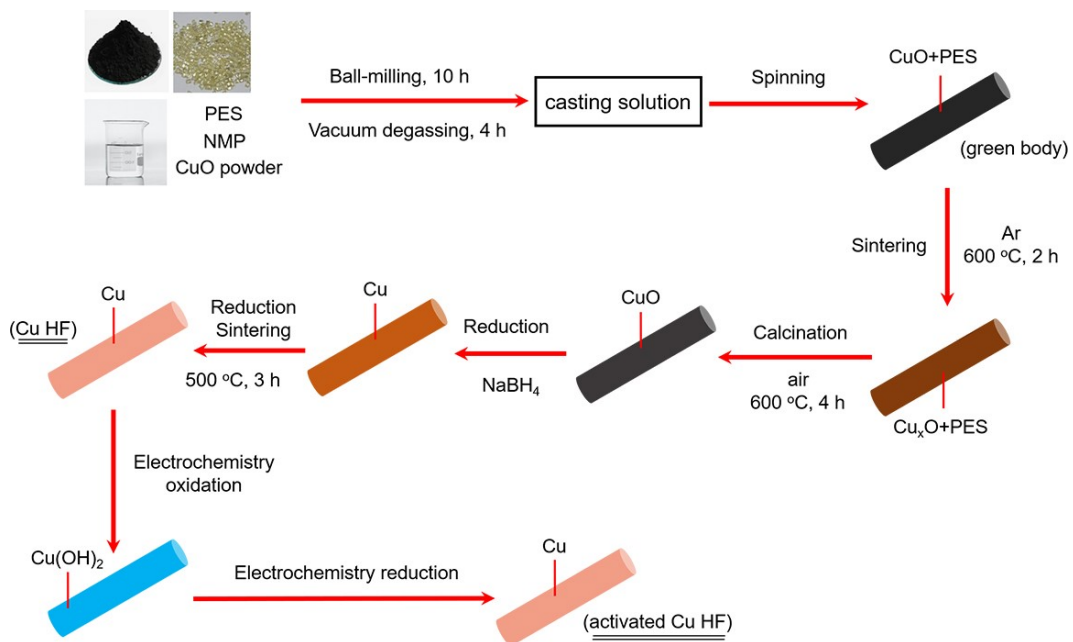

**Fig. S1** Schematic illustration showing the general procedures for the fabrications of Cu HF and activated Cu HF.

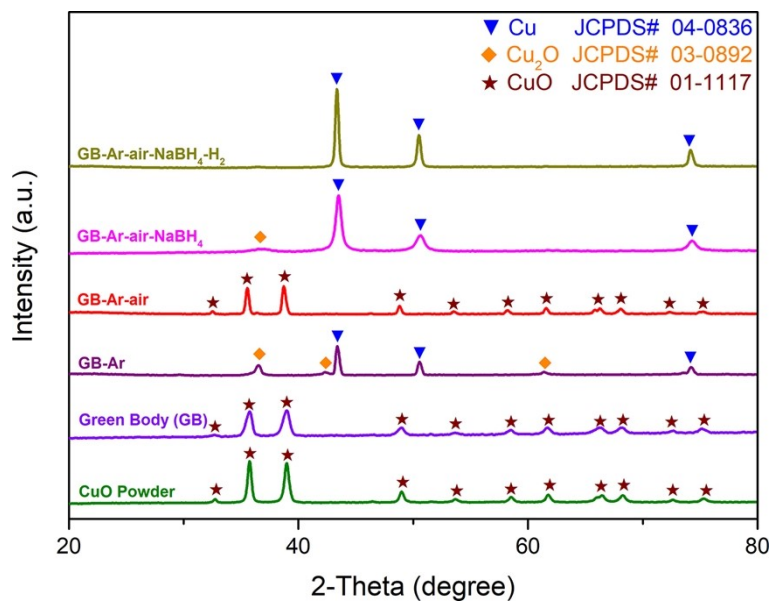

**Fig. S2** XRD patterns of CuO powder (Olive), green body with shaped CuO and PES mixtures (Violet), green body sintered by Ar (Purple), CuO green body obtained by calcinating at 600 °C in the air (Red), Cu green body was obtained by reduction in NaBH<sub>4</sub> solution (Magenta), and Cu HF obtained by sintered in 5% H<sub>2</sub> (Ar balance) (Dark Yellow).

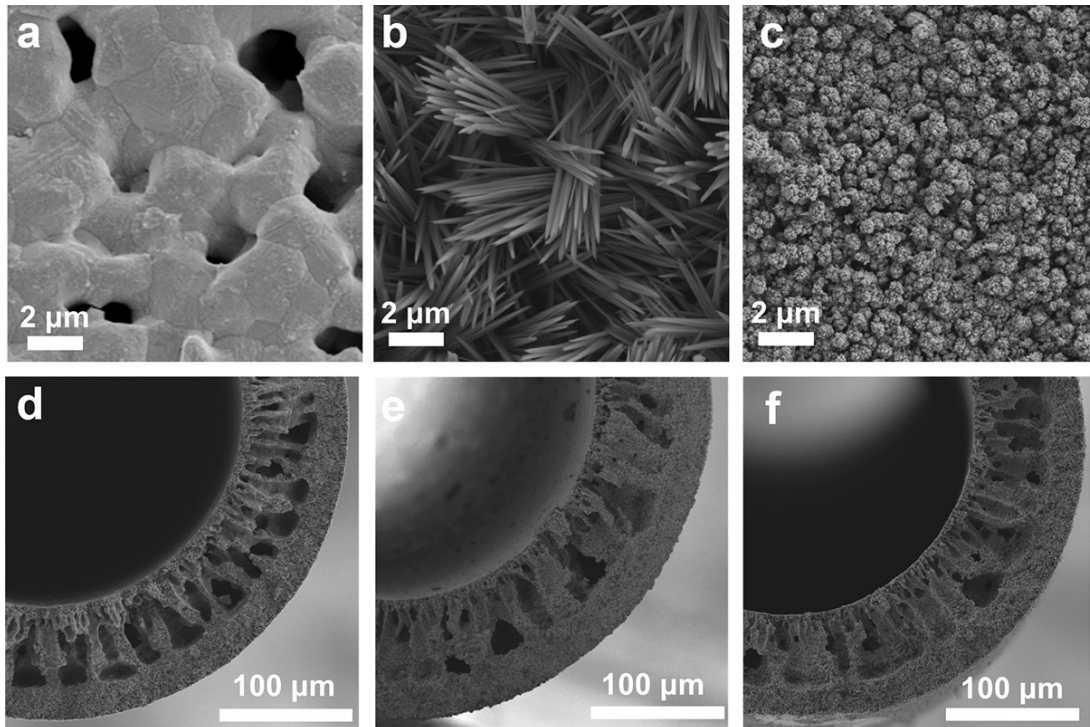

**Fig. S3** SEM images of outer surface and cross-section of (a), (d) Cu HF, (b), (e) electrooxidated Cu HF, and (c), (f) activated Cu HF.

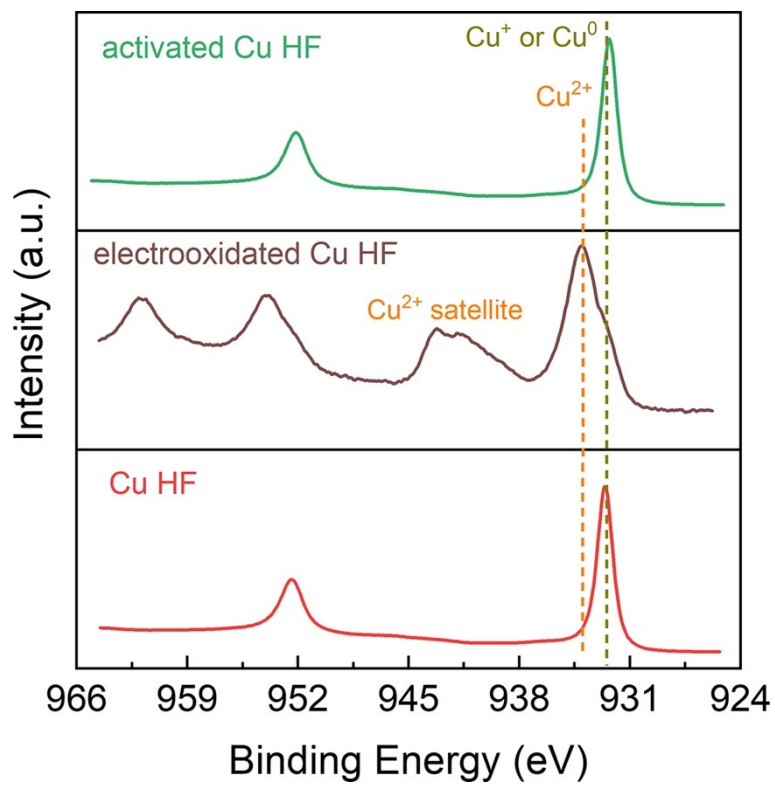

**Fig. S4** Cu 2p XPS spectra of Cu HF, electrooxidated Cu HF and activated Cu HF.

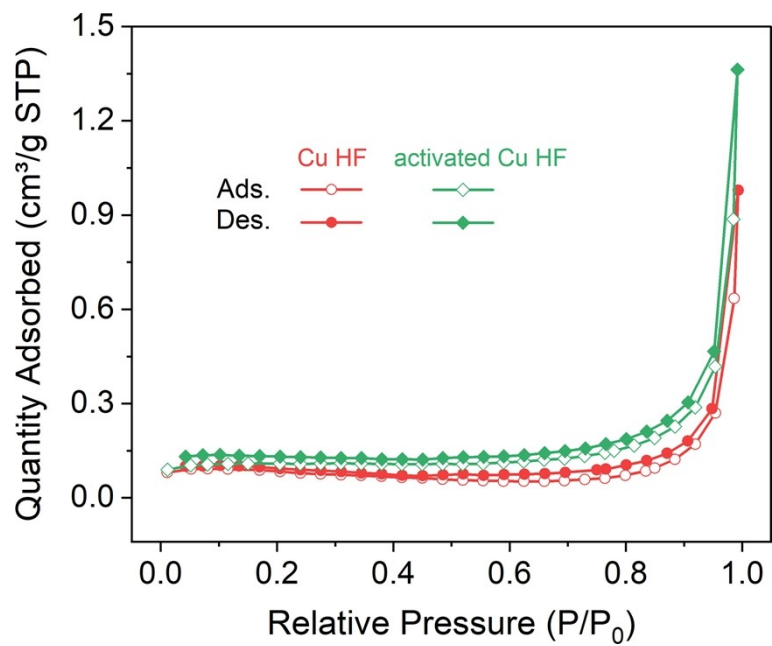

**Fig. S5** N<sub>2</sub> adsorption-desorption isotherms of the Cu HF and activated Cu HF.

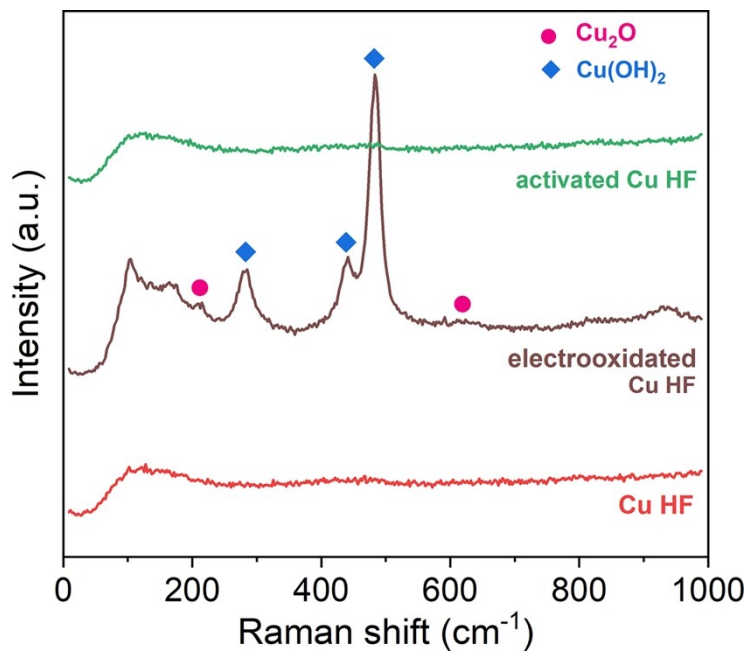

**Fig. S6** Raman spectra of Cu HF, electrooxidated Cu HF and activated Cu HF.

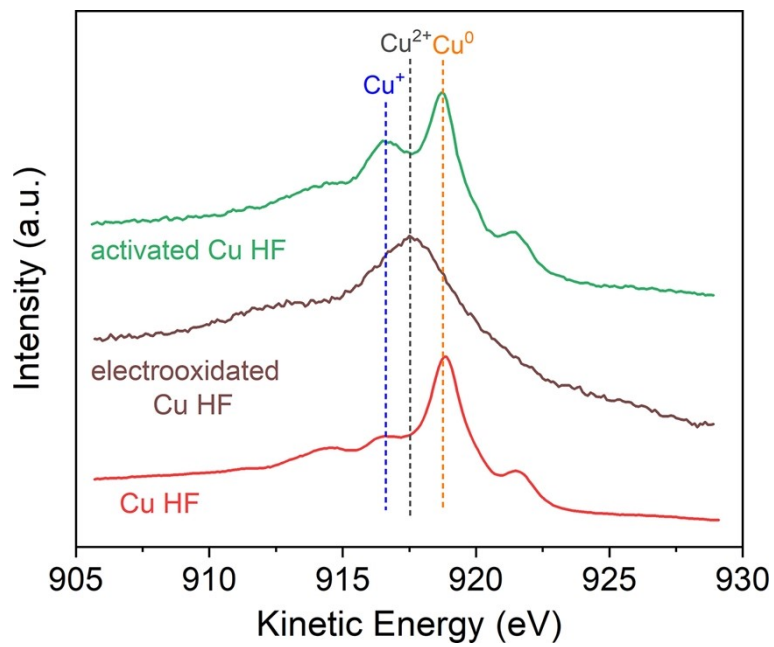

**Fig. S7** Cu LMM Auger spectra of Cu HF, electrooxidated Cu HF and activated Cu HF.



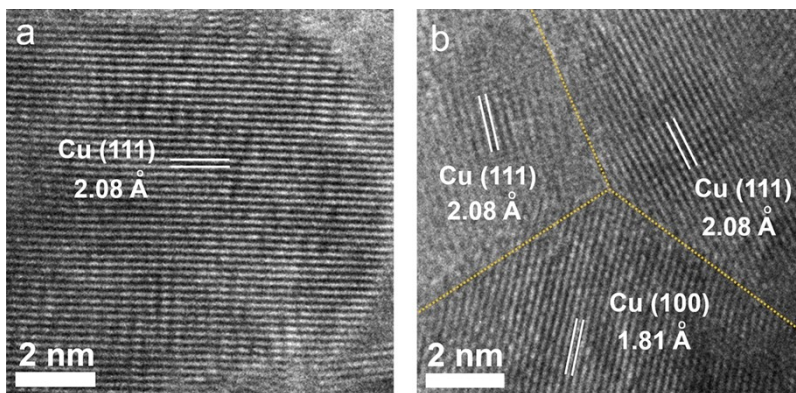

**Fig. S8** HRTEM images of (a) Cu HF, and (b) activated Cu HF.

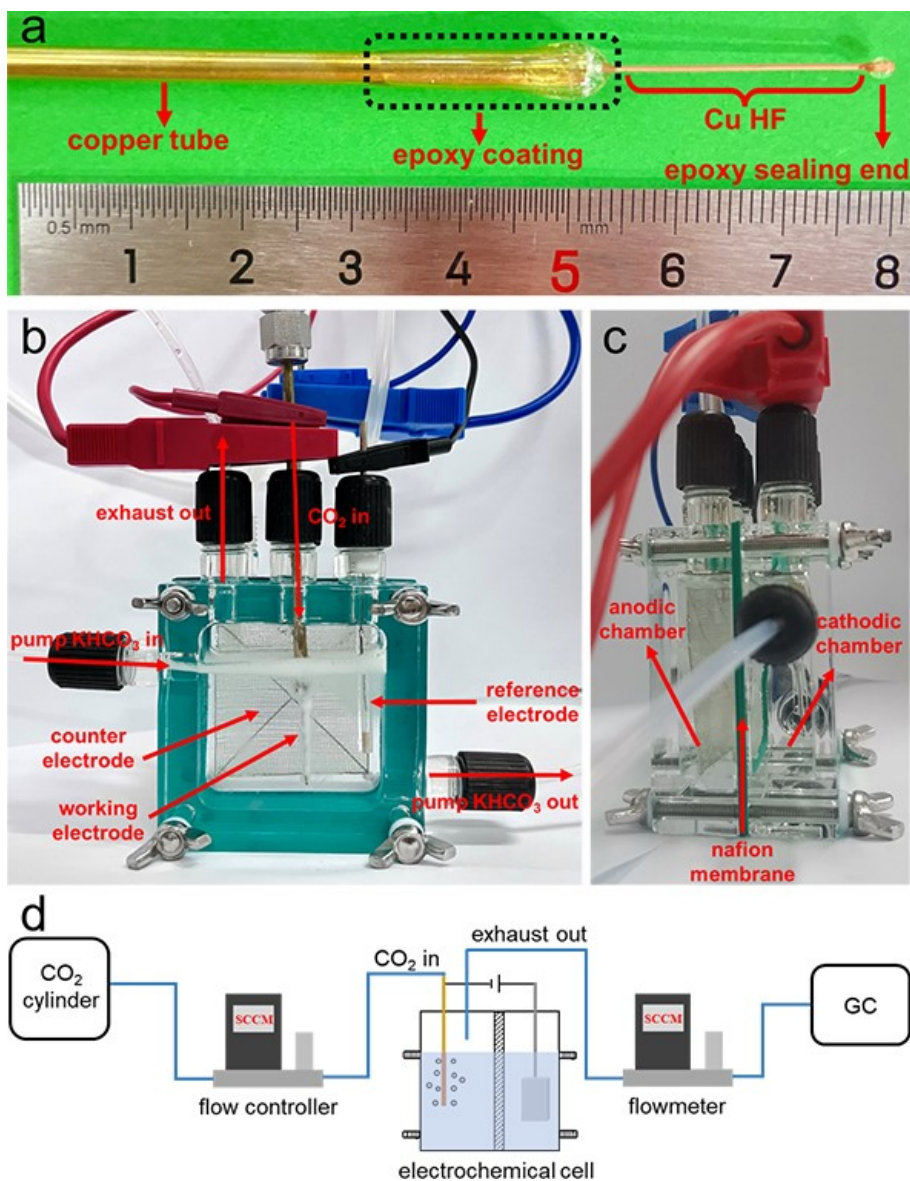

**Fig. S9** Optical images of the (a) Cu HF electrode, (b) side view of the gas-tight two-compartment electrolysis cell, (c) cross-section view of the electrolysis cell, and (d) the schematic illustration of the electrolysis system for CO<sub>2</sub> electroreduction.

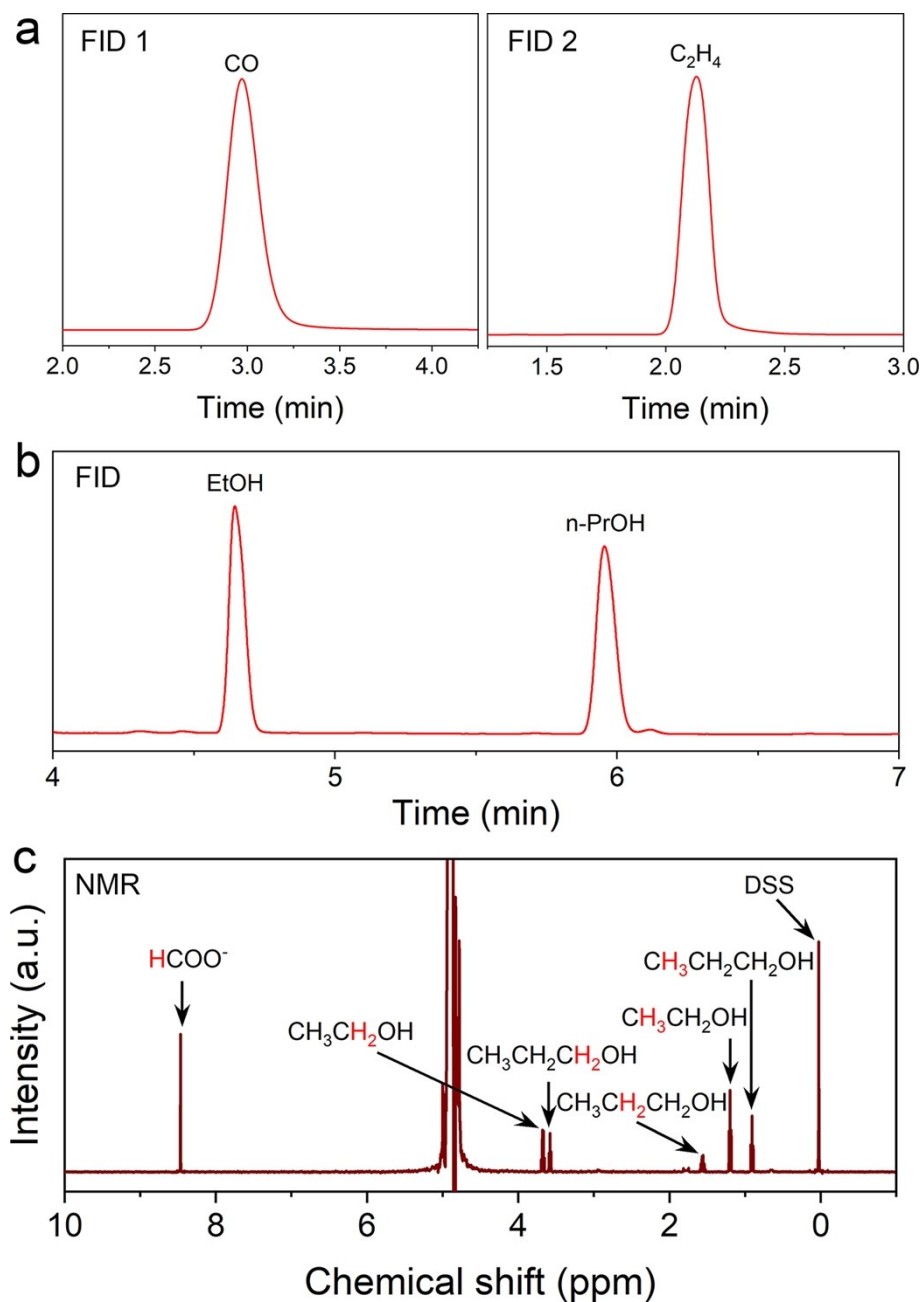

**Fig. S10** (a) Gas chromatogram (FID channel) of the gas products during the eCO<sub>2</sub>RR on activated Cu HF. (b) Off-line Gas chromatogram (FID channel) of alcohols used for detection after eCO<sub>2</sub>RR on activated Cu HF. (c) Representative <sup>1</sup>H NMR spectrum of the catholyte after eCO<sub>2</sub>RR on activated Cu HF.

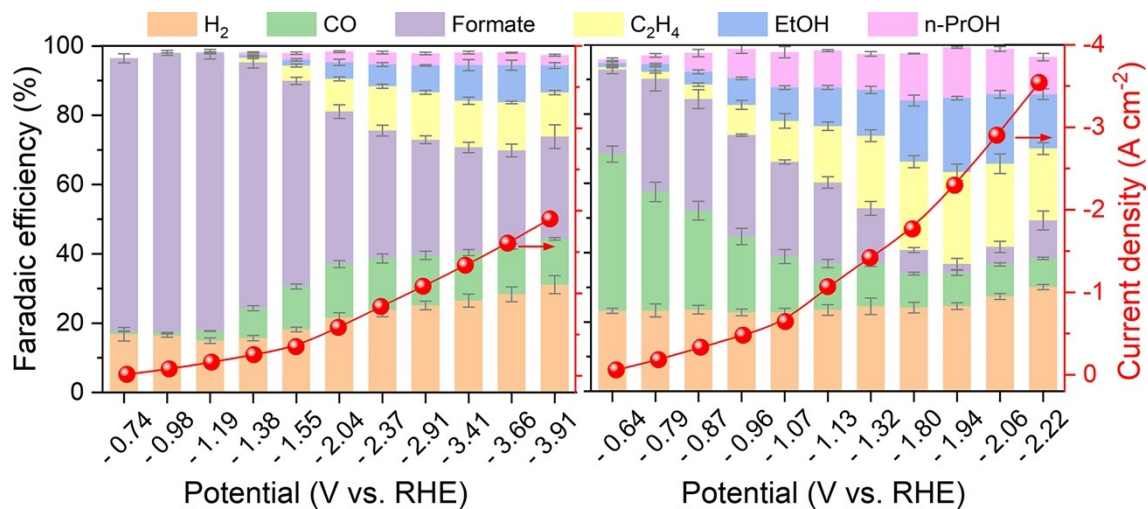

**Fig. S11** Full product distributions and total current densities of Cu HF (left) and activated Cu HF (right) at different applied potentials.

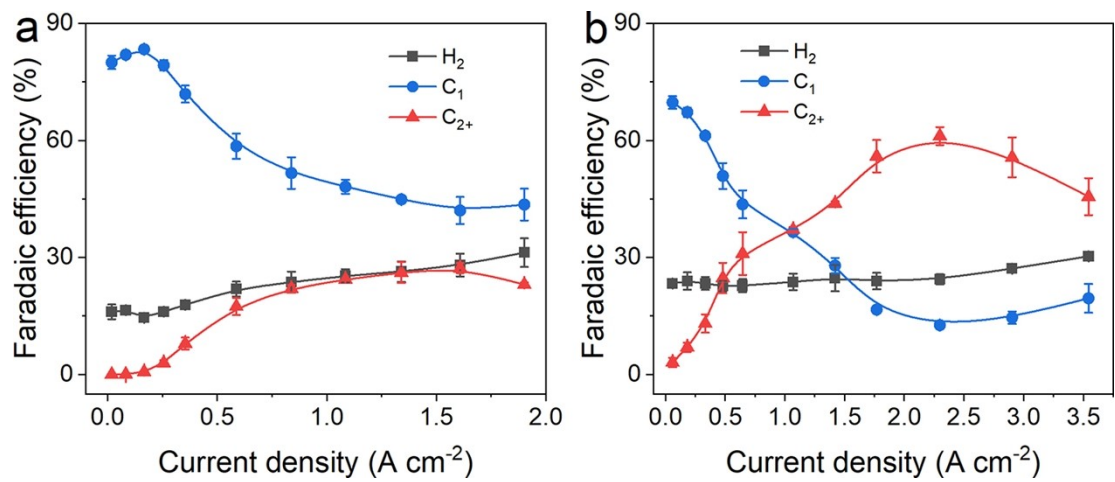

**Fig. S12** Faradaic efficiency of H<sub>2</sub>, C<sub>1</sub>, and C<sub>2+</sub> products of (a) Cu HF and (b) activated Cu HF at different current densities.

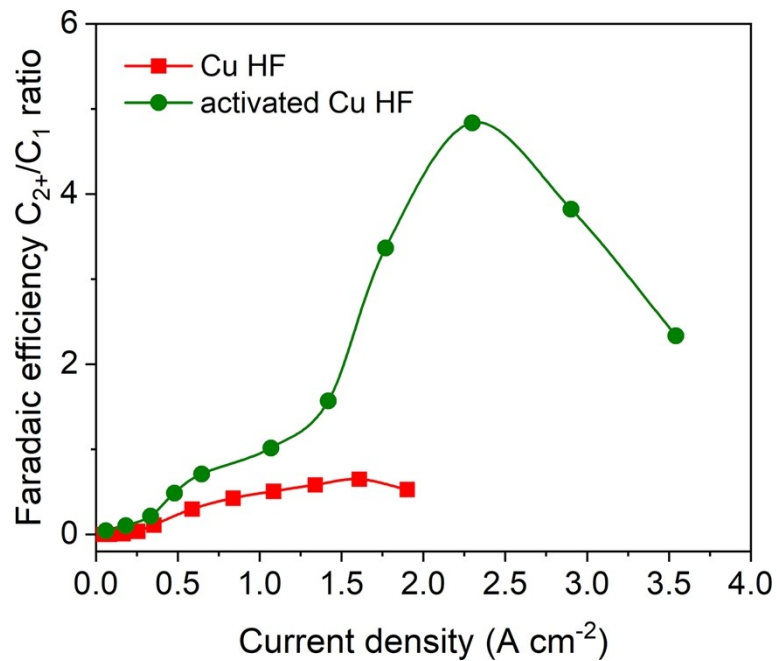

Fig. S13  $C_{2+}/C_1$  ratio at different current densities over Cu HF and activated Cu HF.

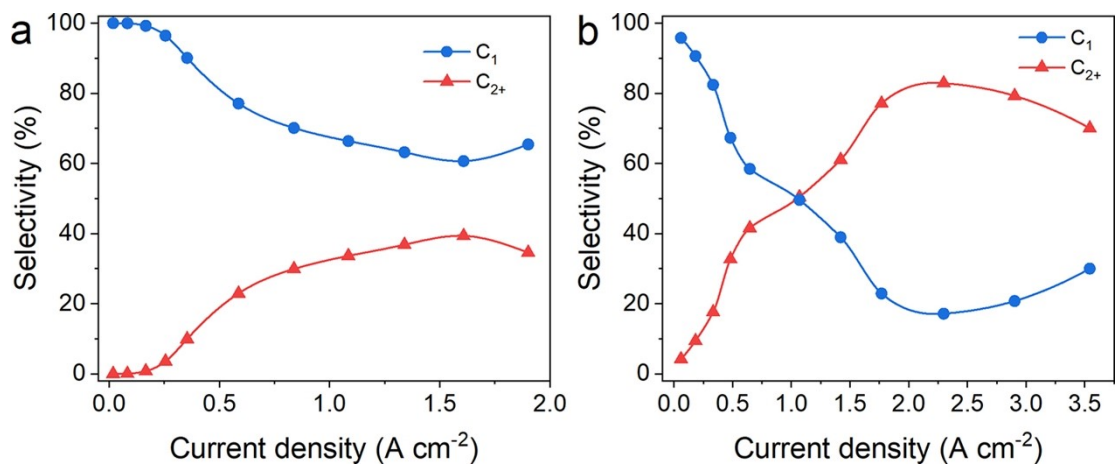

**Fig. S14** Conversion efficiency of CO<sub>2</sub> to C<sub>1</sub> and C<sub>2+</sub> products at different current densities of (a) Cu HF, and (b) activated Cu HF.

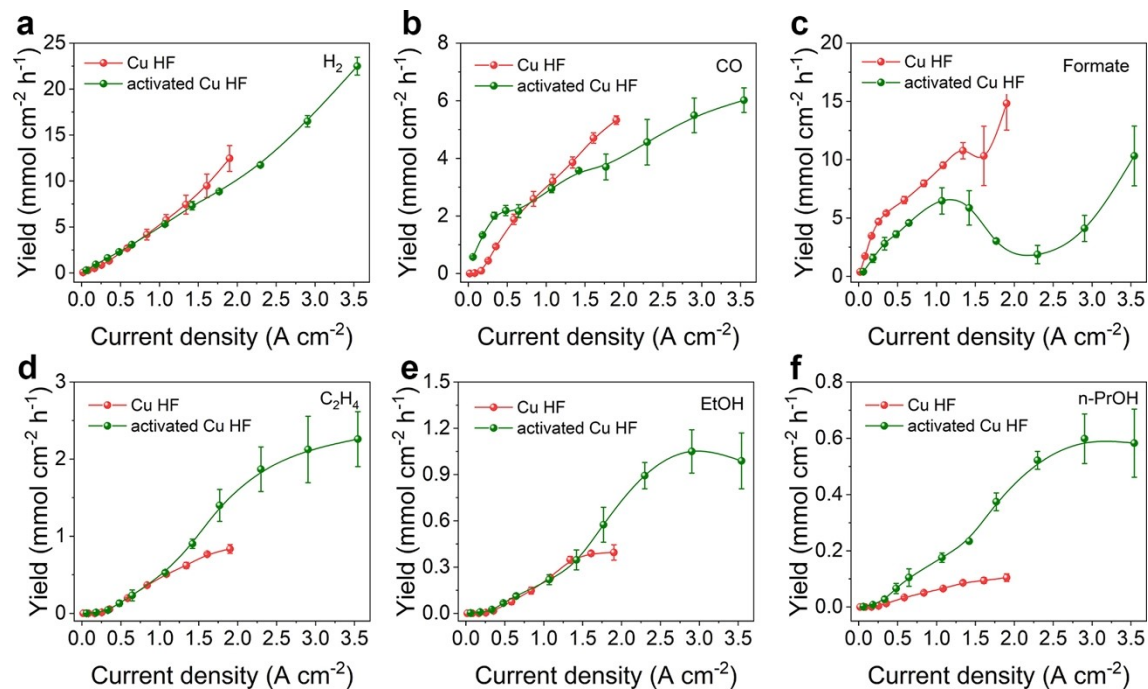

**Fig. S15** Yields of the products (a)  $\text{H}_2$ , (b) CO, (c) formate, (d)  $\text{C}_2\text{H}_4$ , (e) EtOH, and (f) n-PrOH over the Cu HF and activated Cu HF electrodes.



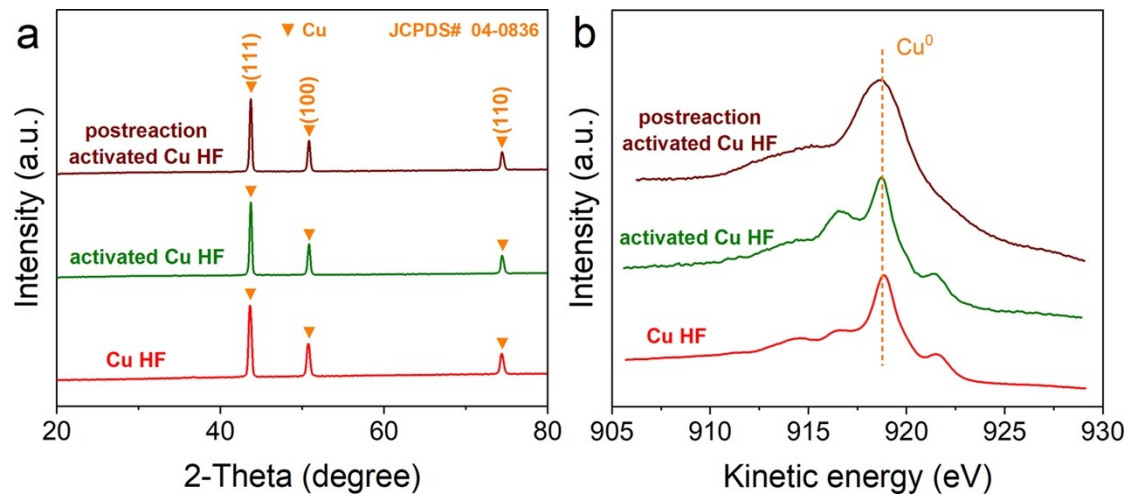

**Fig. S16** The XRD patterns (a) and Cu LMM Auger spectra (b) of Cu HF (red), activated Cu HF (green), and postreaction activated Cu HF (wine).

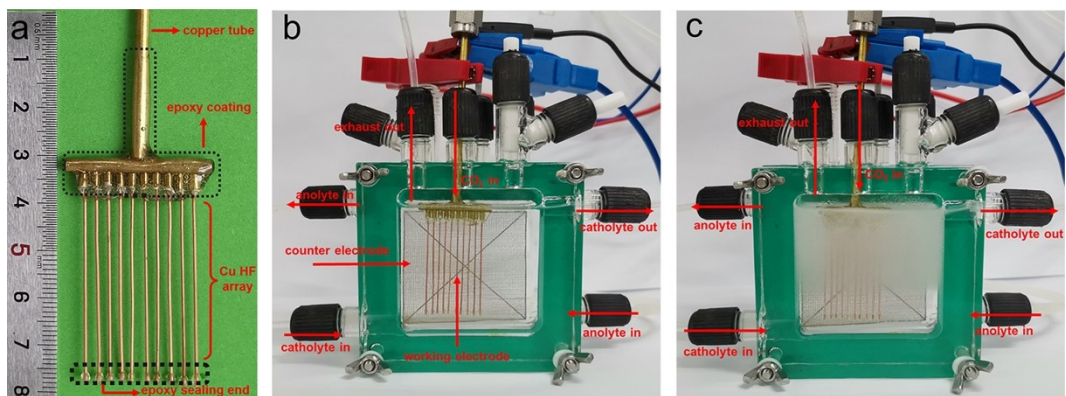

**Fig. S17** Optical images of the (a) 10-tube activated Cu HF array, (b) side view of the gas-tight two-compartment electrolysis cell, and (c) the electrolysis cell during CO<sub>2</sub> electroreduction.

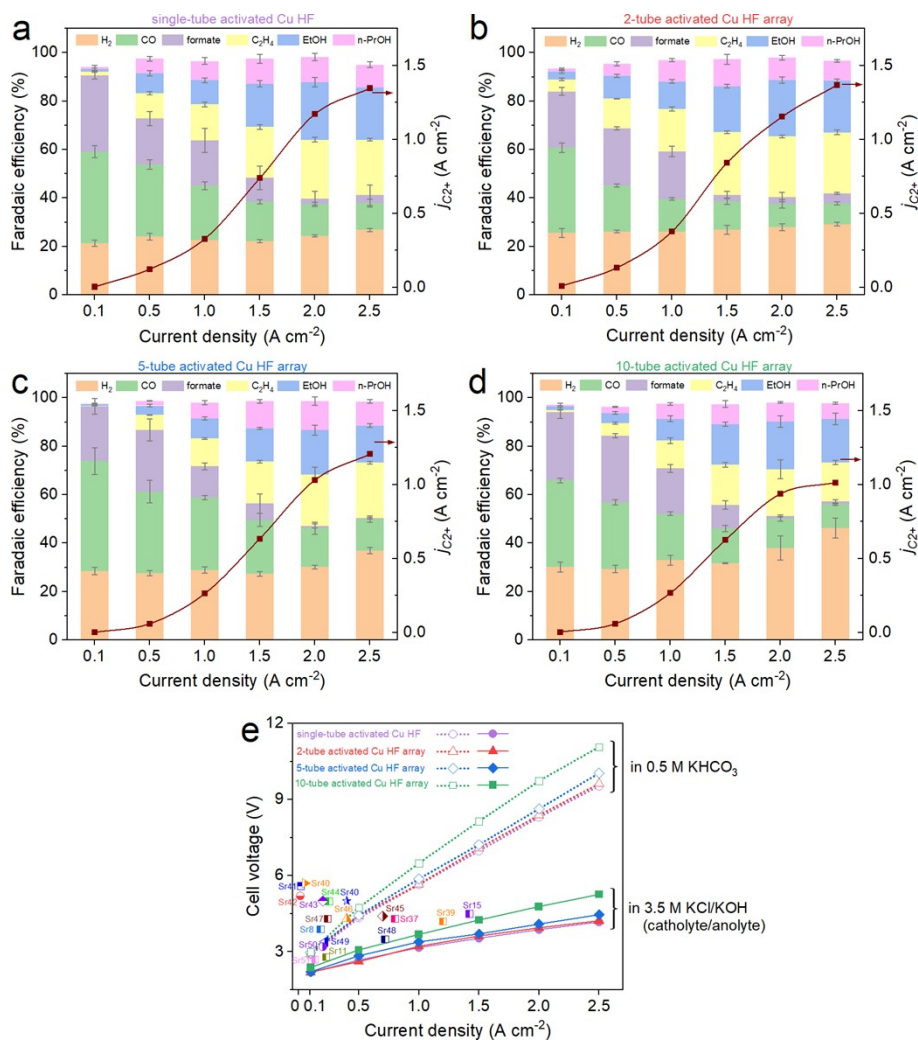

**Fig. S18** Full product distributions and  $C_{2+}$  partial current densities at different current densities in 0.5 M  $KHCO_3$  in the 2-electrode systems using (a) single-tube activated Cu HF, (b) 2-tube activated Cu HF array, (c) 5-tube activated Cu HF array, and (d) 10-tube activated Cu HF array. (e) Cell voltages at different current densities in 0.5 M  $KHCO_3$  and 3.5 M KCl (as catholyte, KOH as anolyte), respectively, and their overall comparison with other electrocatalyst 2-electrode systems. All comparison data points are from the references summarized in Table S5, and the key data points are referred to the corresponding Supplementary references Sr<sub>x</sub>, where x represents the Supplementary reference number.

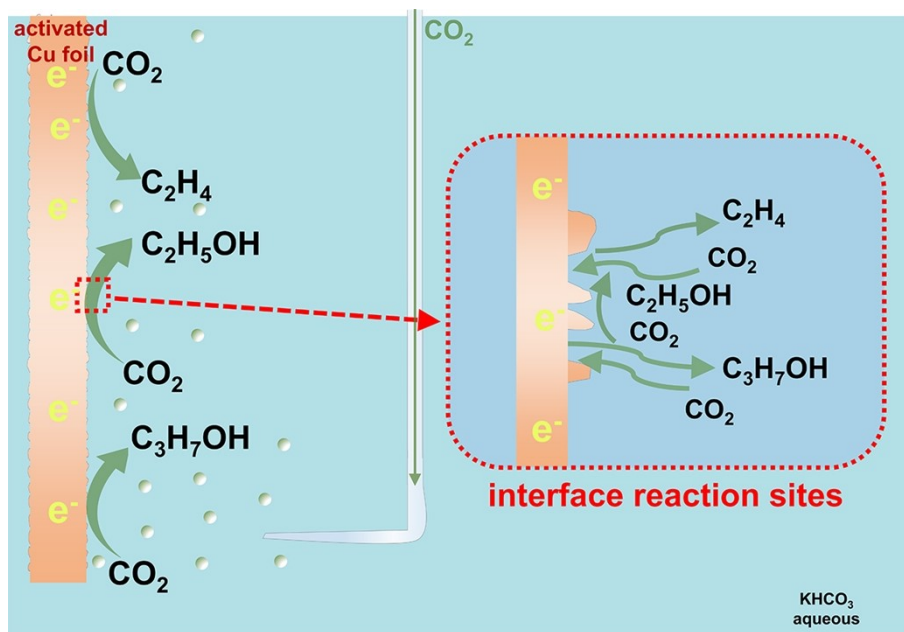

**Fig. S19** Schematic illustrations showing the processes of  $CO_2$  electroreduction over activated Cu foil.

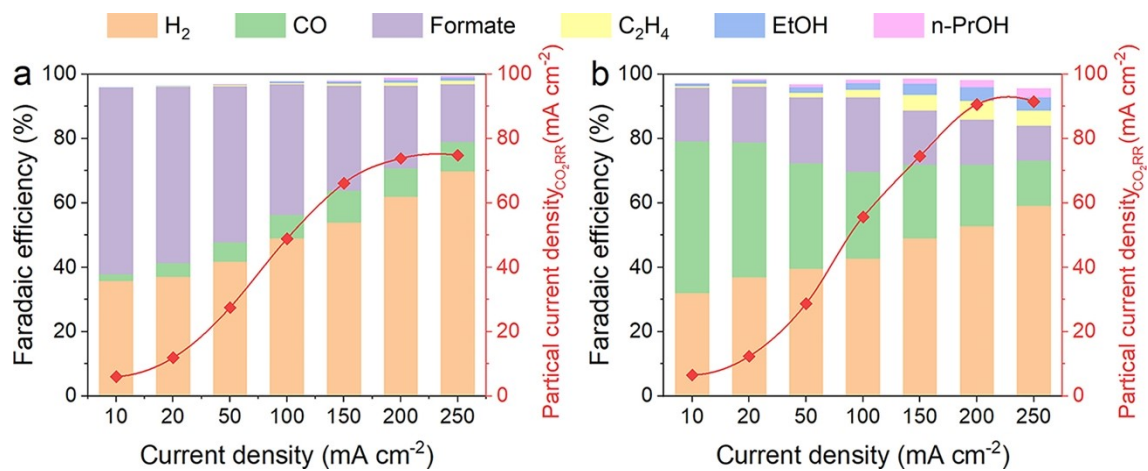

**Fig. S20** Full product distributions and CO<sub>2</sub>RR partial current density at different current densities of (a) Cu HF with non-penetration mode and (b) activated Cu HF with non-penetration mode.

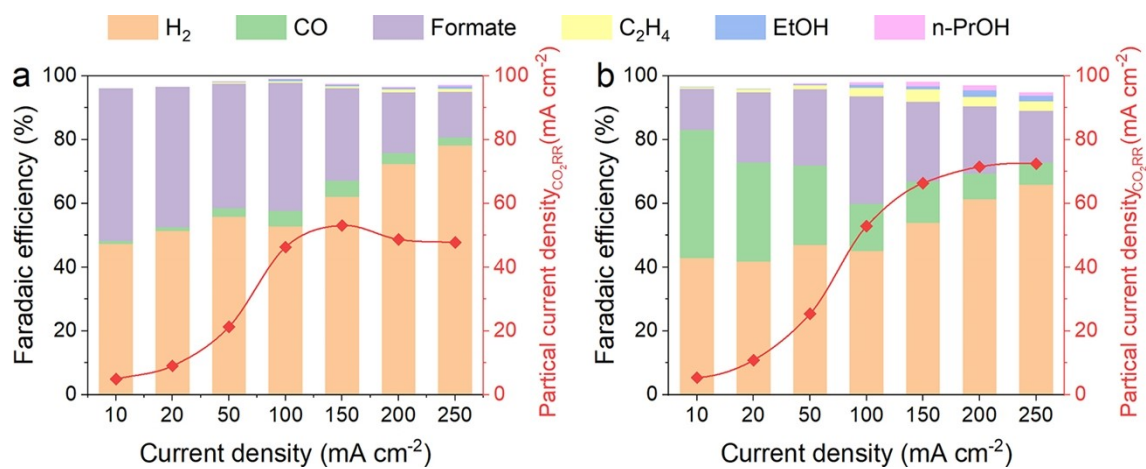

**Fig. S21** Full product distributions and CO<sub>2</sub>RR partial current density at different current densities of (a) Cu foil and (b) activated Cu foil.

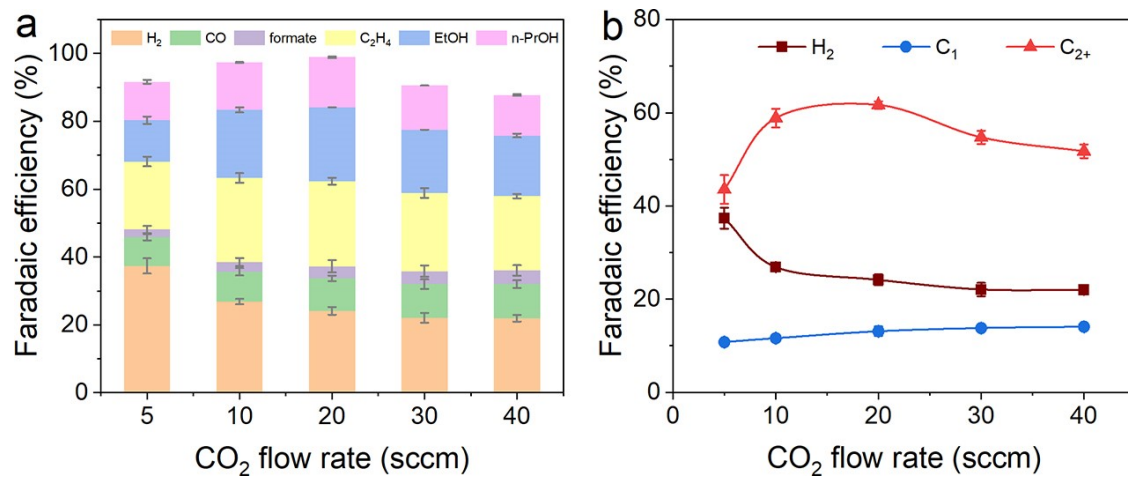

**Fig. S22** (a) Full product distributions and (b) H<sub>2</sub>, C<sub>1</sub>, and C<sub>2+</sub> products of activated Cu HF at 2.0 A cm<sup>-2</sup> with different CO<sub>2</sub> flow rates.

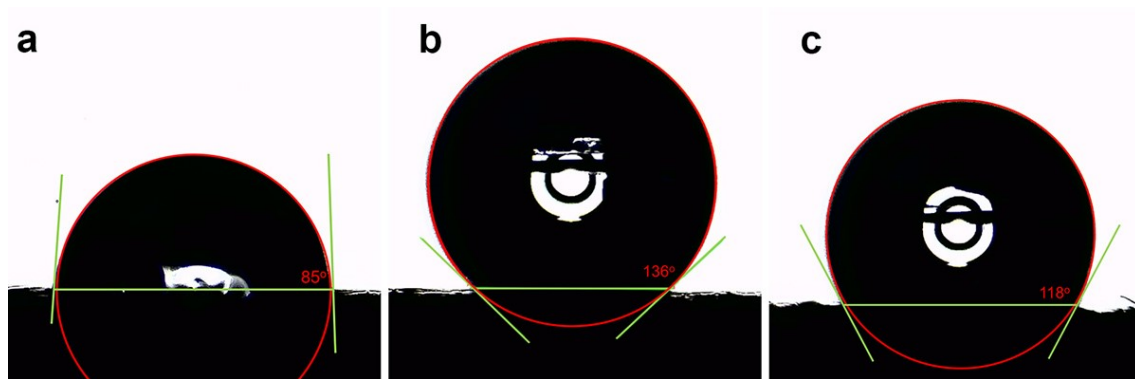

**Fig. S23** The contact angles on the surfaces of (a) Cu HF, (b) electrooxidated Cu HF, and (c) activated Cu HF were tested.



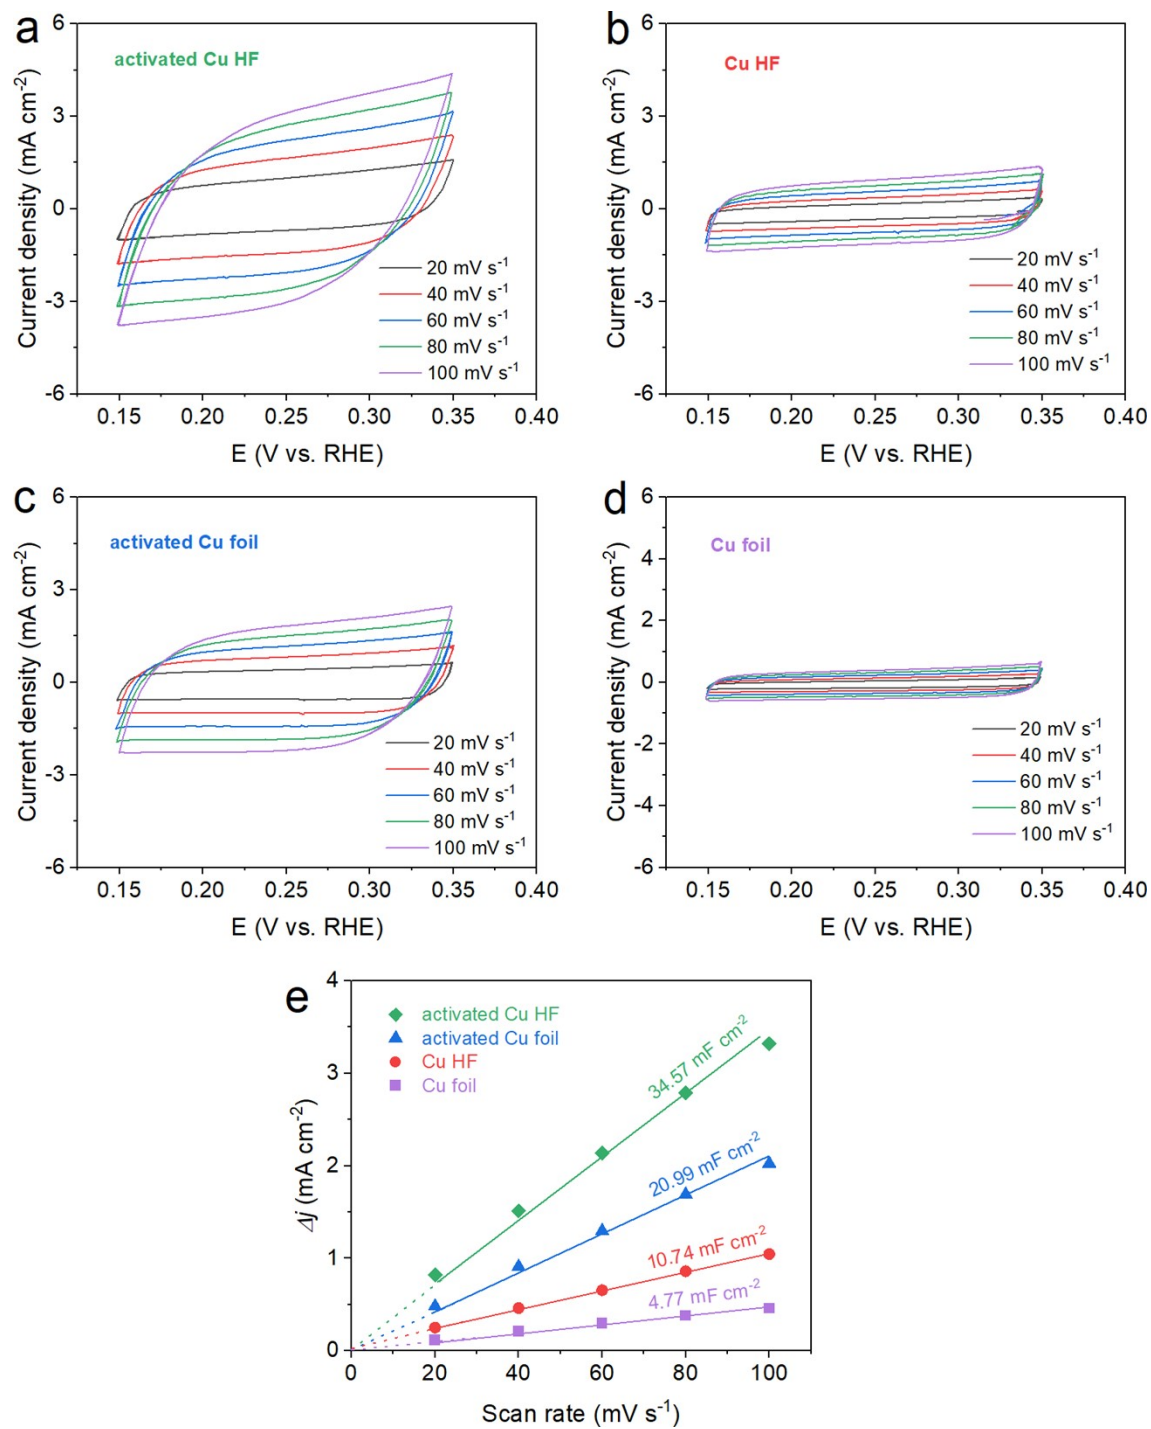

**Fig. S24** Cyclic voltammetry curves of (a) activated Cu HF, (b) Cu HF, (c) activated Cu foil, and (d) Cu foil in Ar-saturated 0.5 M KHCO<sub>3</sub>. (e) The plot of current density against the scan rates.

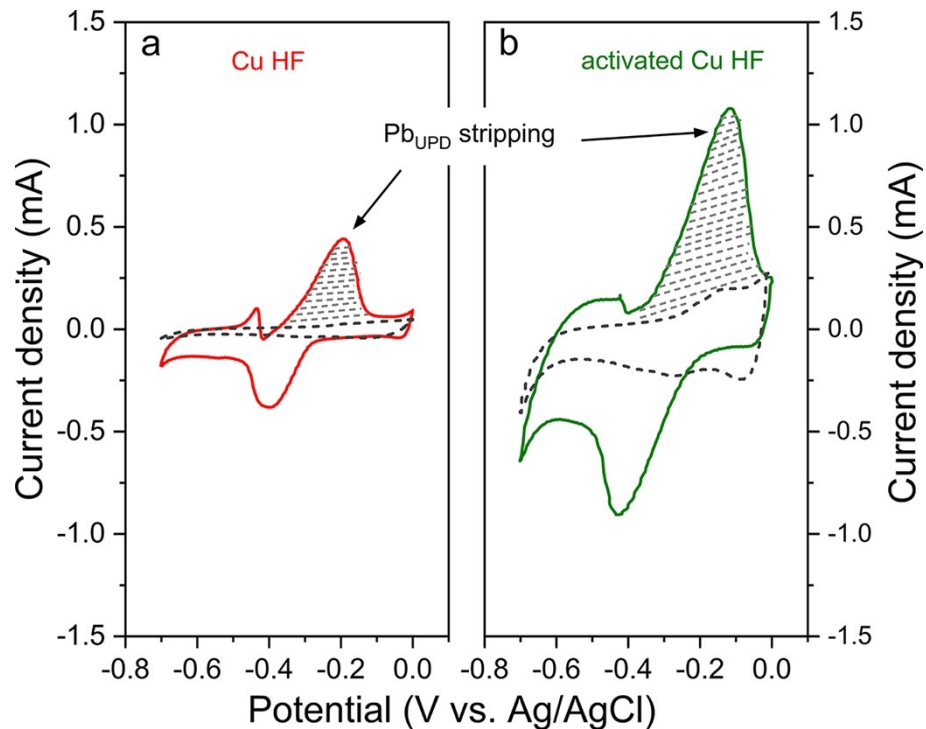

**Fig. S25** Experiments of underpotential deposition of  $\text{Pb}^{2+}$  of (a) Cu HF and (b) activated Cu HF in two electrolytes: 1.0 mM  $\text{PbCl}_2$  + 0.01 M  $\text{HClO}_4$  (solid) and 0.01 M  $\text{HClO}_4$  only (dashed). A cathodic peak observed ca. -0.38 V vs. Ag/AgCl corresponds to Pb UPD on Cu, and the anodic peak ca. -0.19 V corresponds to stripping of the Pb UPD monolayer layer. The charge density associated with Pb UPD stripping of  $350 \mu\text{C cm}^{-2}$  was reported in the previous literature.<sup>1</sup>

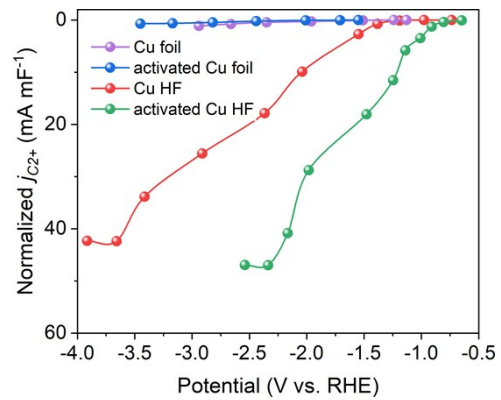

**Fig. S26** ECSA-normalized partial current density of total  $C_{2^+}$  products over Cu foil, activated Cu foil, Cu HF, and activated Cu HF.

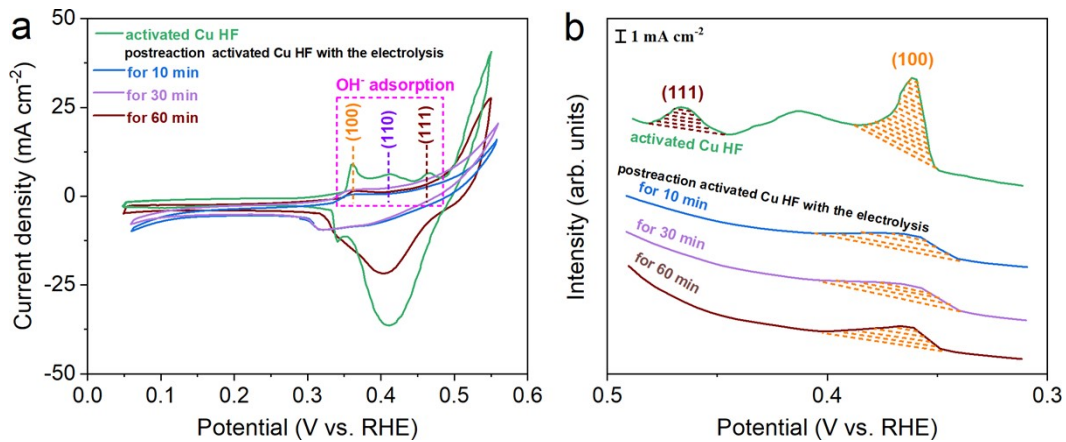

**Fig. S27** (a) Voltammogram curves collected in 1 M KOH at room temperature with a sweep rate of  $50 \text{ mV s}^{-1}$ , and (b) OH<sup>-</sup> adsorption profiles of activated Cu HF after the electrolysis for 10, 30, and 60 min, respectively.

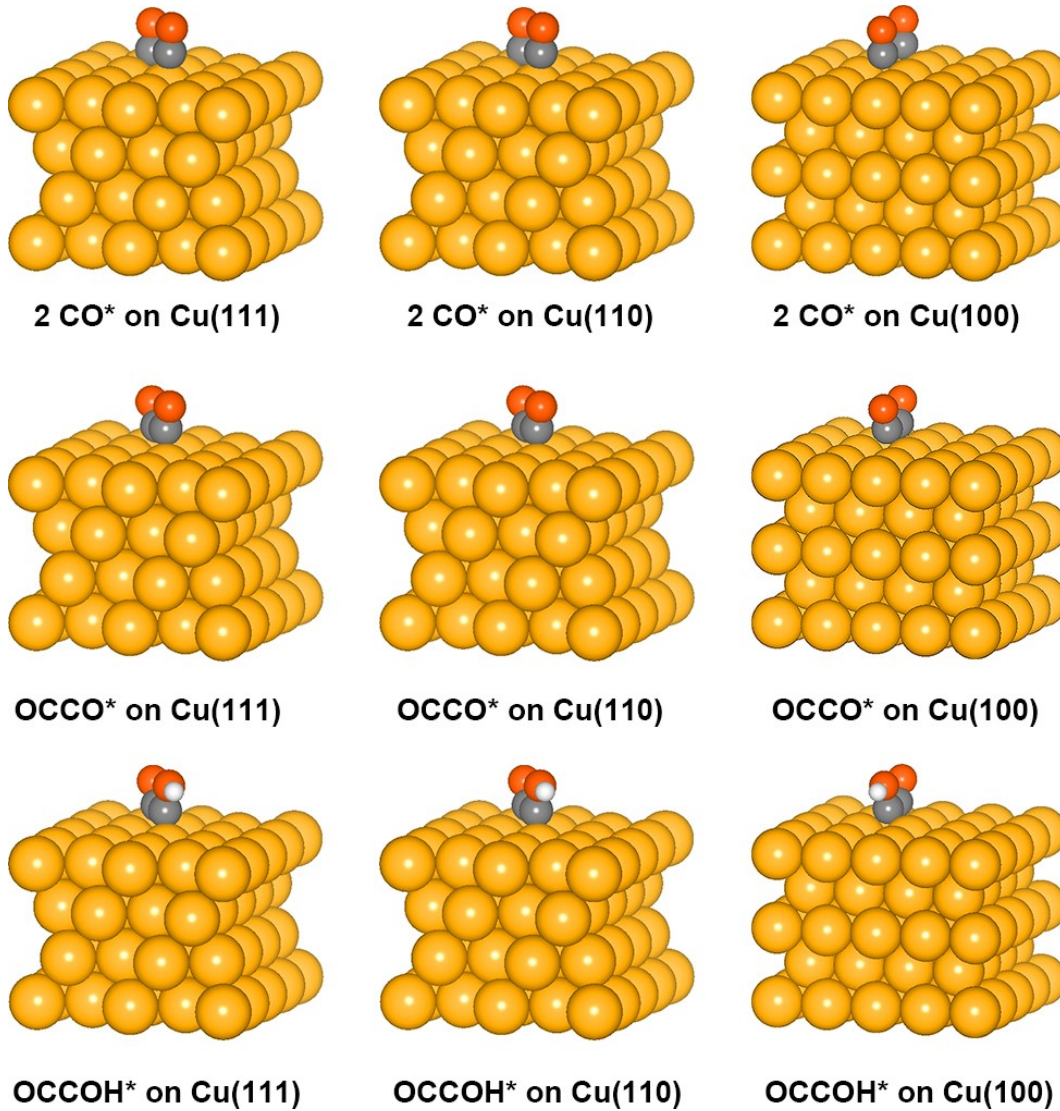

**Fig. S28** Optimized surface slabs with adsorbed 2CO\*, OCCO\*, and OCCOH\* on Cu (100), Cu (110), and Cu (111).

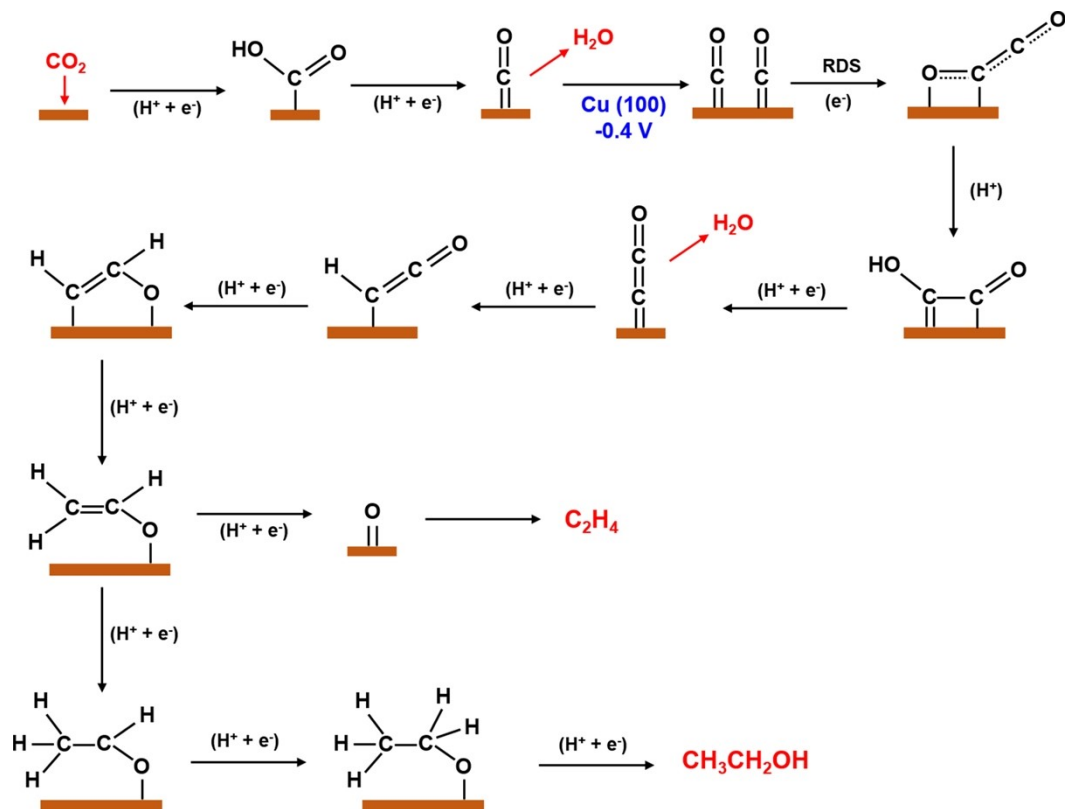

**Fig. S29** Possible reaction pathways for the electrocatalytic reduction of CO<sub>2</sub> to C<sub>2</sub> products. Species in black are adsorbates, while those in red are reactants or products in solution. Potentials are reported versus RHE, while RDS indicates rate-determining steps and (H<sup>+</sup> + e<sup>-</sup>) indicates steps in which either concerted or separated proton-electron transfer takes place.<sup>2</sup>

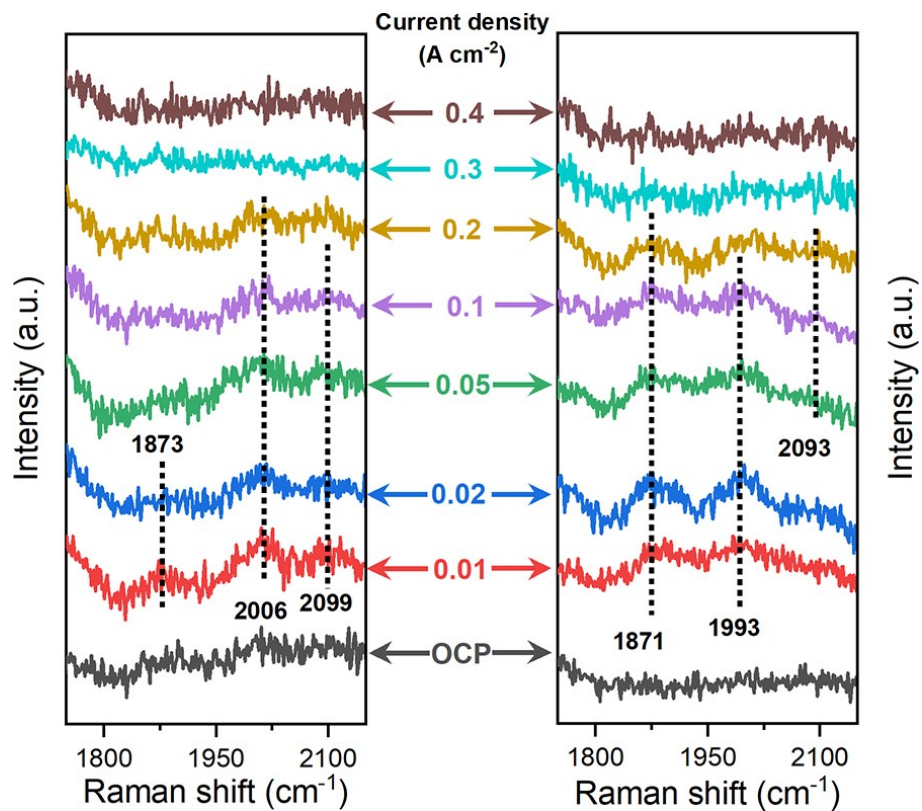

**Fig. S30** In situ Raman spectra of Cu HF (left) and activated Cu HF (right) from 0.01 to 0.4 A cm<sup>-2</sup> in CO<sub>2</sub>-saturated 0.5 M KHCO<sub>3</sub> solution. All indicated peaks are assigned to the C≡O stretching mode.

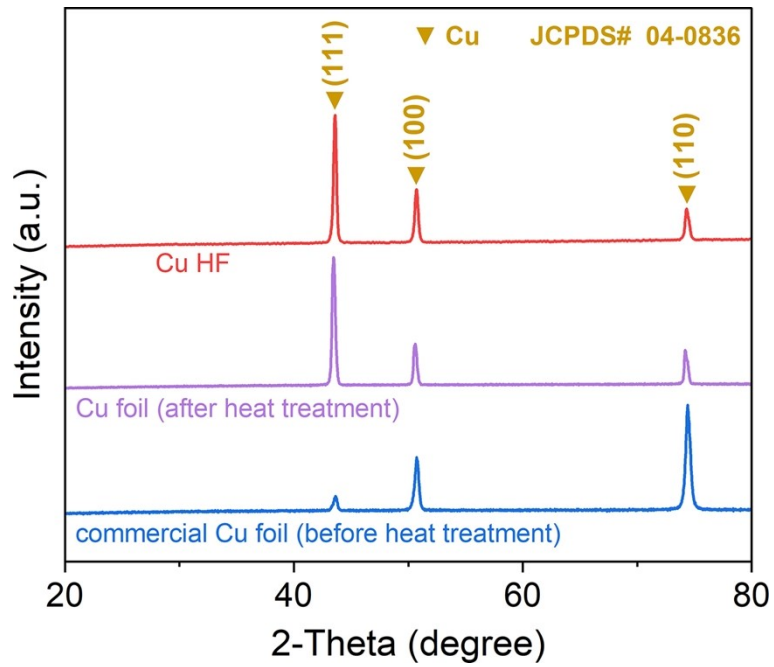

**Fig. S31** XRD patterns of Cu HF, Cu foil (obtained from redox heat treatment) and commercial Cu foil.



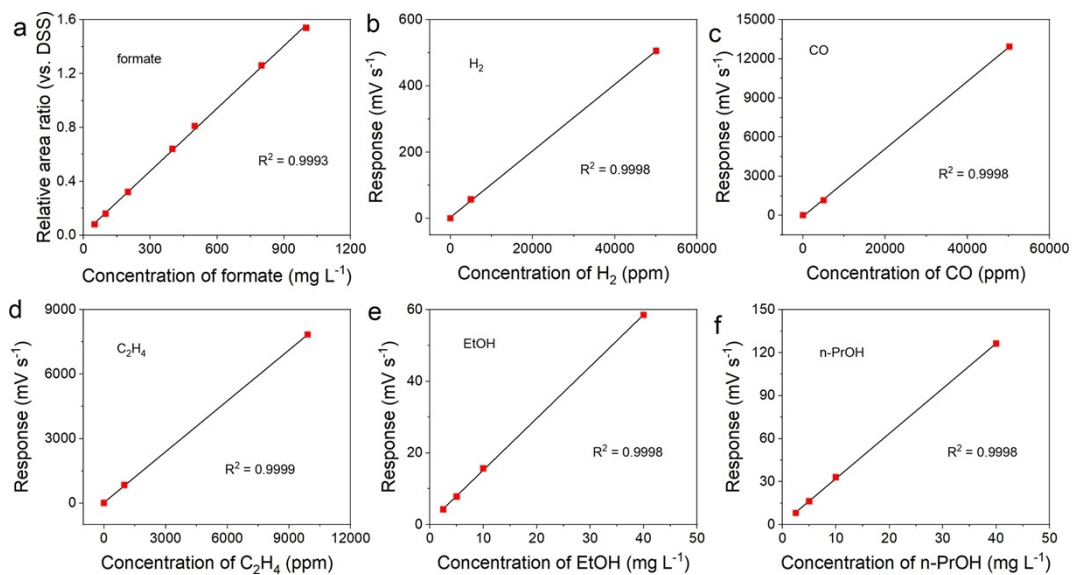

**Fig. S32** Standard correlation curves and the corresponding linear correlation coefficients of all products. (a) formate detected by NMR, and (b)  $\text{H}_2$ , (c) CO, (d)  $\text{C}_2\text{H}_4$ , (e) EtOH, and (f) n-PrOH detected by GC.

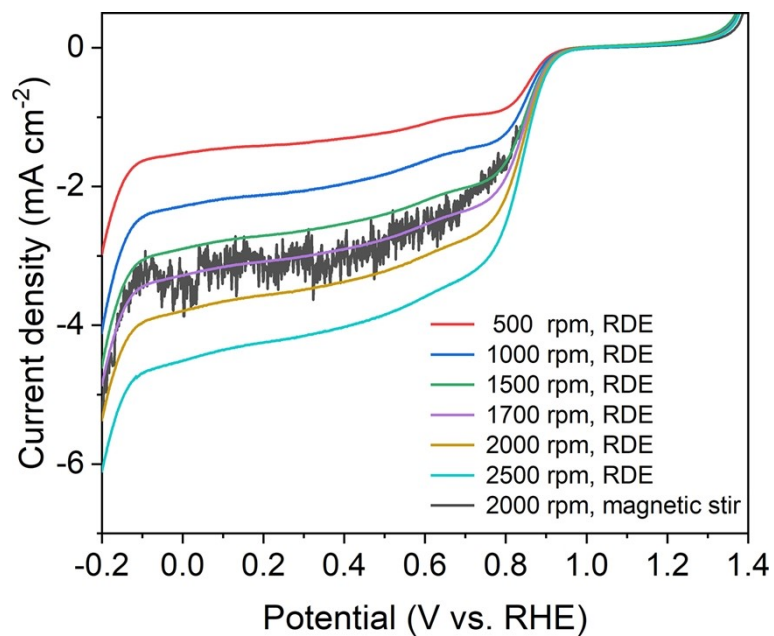

**Fig. S33** LSV curves were measured at different rotation rates and magnetic stirrer with a speed of 2000 rpm.

**Table S1** The pore structure parameters of Cu HF and activated Cu HF were obtained by N<sub>2</sub> sorption isotherm and mercury intrusion porosimetry, respectively.

| Method                              | Parameters                                     | Cu HF    | activated Cu HF |
|-------------------------------------|------------------------------------------------|----------|-----------------|
| N <sub>2</sub> sorption measurement | Surface Area (m <sup>2</sup> g <sup>-1</sup> ) | 0.3775   | 0.4194          |
|                                     | Pore Volume (cm <sup>3</sup> g <sup>-1</sup> ) | 0.000621 | 0.000398        |
|                                     | Calculated porosity (%)                        | 0.28     | 0.18            |
| Mercury intrusion porosimetry       | Calculated porosity (%)                        | 68       | 59              |

**Table S2** Comparisons of the electrocatalytic performance for CO<sub>2</sub> to C<sub>2+</sub> products at different applied potentials in different electrolytes.

| Potential (V vs. RHE) | Electrolyte             | Product                       | FE (%) | $j_{C2+}$ (mA cm <sup>-2</sup> ) | $j_{total}$ (A cm <sup>-2</sup> ) | Ref.      |
|-----------------------|-------------------------|-------------------------------|--------|----------------------------------|-----------------------------------|-----------|
| -1.07                 | 0.5 M KHCO <sub>3</sub> | C <sub>2+</sub>               | 34.9   | 225                              | 0.6                               | This work |
| -1.32                 | 0.5 M KHCO <sub>3</sub> | C <sub>2+</sub>               | 44.2   | 628                              | 1.4                               |           |
| -1.94                 | 0.5 M KHCO <sub>3</sub> | C <sub>2+</sub>               | 62.8   | 1442                             | 2.3                               |           |
| -0.70                 | 3.5 M KCl*              | C <sub>2+</sub>               | 27.9   | 139                              | 0.5                               | This work |
| -0.84                 | 3.5 M KCl               | C <sub>2+</sub>               | 47.5   | 475                              | 1.0                               |           |
| -0.95                 | 3.5 M KCl               | C <sub>2+</sub>               | 64.8   | 1296                             | 2.0                               |           |
| -1.00                 | 0.5 M KHCO <sub>3</sub> | C <sub>2</sub> H <sub>4</sub> | 45.0   | 45                               | 0.1                               | 3         |
| -1.20                 | 0.5 M KHCO <sub>3</sub> | C <sub>2+</sub>               | 57.3   | 41                               | 0.07                              | 4         |
| -1.40                 | 0.5 M KHCO <sub>3</sub> | C <sub>2+</sub>               | 36.0   | 32                               | 0.09                              |           |
| -1.00                 | 0.5 M KHCO <sub>3</sub> | C <sub>2+</sub>               | 51.0   | 17                               | 0.03                              | 5         |
| -1.00                 | 0.5 M KHCO <sub>3</sub> | C <sub>2</sub> H <sub>4</sub> | 11.3   | 2                                | 0.02                              | 6         |
| -1.02                 | 0.5 M KHCO <sub>3</sub> | C <sub>2</sub> H <sub>4</sub> | 36.0   | 20                               | 0.06                              | 7         |
| -1.31                 | 0.5 M KHCO <sub>3</sub> | C <sub>2</sub> H <sub>4</sub> | 10.0   | 10                               | 0.10                              |           |
| -0.83                 | 1.0 M KHCO <sub>3</sub> | C <sub>2</sub> H <sub>4</sub> | 72.0   | 232                              | 0.3                               | 8         |
| -1.20                 | 0.1 M KHCO <sub>3</sub> | C <sub>2+</sub>               | 52.0   | 31                               | 0.06                              | 9         |
| -1.39                 | 0.1 M KHCO <sub>3</sub> | C <sub>2+</sub>               | 47.5   | 46                               | 0.1                               |           |
| -0.98                 | 0.1 M KHCO <sub>3</sub> | C <sub>2+</sub>               | 59.0   | 23                               | 0.04                              | 10        |
| -1.19                 | 0.1 M KHCO <sub>3</sub> | C <sub>2+</sub>               | 45.0   | 24                               | 0.05                              |           |
| -0.89                 | 0.75 M KOH              | C <sub>2+</sub>               | 80.0   | 1280                             | 1.6                               | 11        |
| -1.00                 | 0.75 M KOH              | C <sub>2+</sub>               | 58.0   | 1160                             | 2.0                               |           |
| -0.97                 | 1.0 M KOH               | C <sub>2+</sub>               | 90.0   | 390                              | 0.4                               | 12        |
| -1.00                 | 1.0 M KOH               | C <sub>2+</sub>               | 66.1   | 591                              | 0.9                               | 13        |
| -1.15                 | 1.0 M KOH               | C <sub>2+</sub>               | 73.7   | 909                              | 1.2                               | 14        |
| -1.21                 | 1.0 M KOH               | C <sub>2+</sub>               | 57.0   | 820                              | 1.4                               |           |
| -0.55                 | 3.5 M KOH               | C <sub>2</sub> H <sub>4</sub> | 63.0   | 473                              | 0.8                               | 15        |
| -0.91                 | 7.0 M KOH               | C <sub>2+</sub>               | 78.2   | 1212                             | 1.6                               | 16        |
| -1.10                 | 0.1 M KCl               | C <sub>2+</sub>               | 79.0   | 55                               | 0.7                               | 17        |
| -0.80                 | 0.1 M KCl               | EtOH                          | 43.0   | 0.2                              | 0.0005                            | 18        |
| -1.20                 | 0.1 M KCl               | EtOH                          | 18.0   | 1                                | 0.006                             |           |
| -1.20                 | 0.1 M KCl               | C <sub>2</sub> H <sub>4</sub> | 45.2   | 8                                | 0.02                              | 19        |
| -1.30                 | 0.1 M KCl               | C <sub>2</sub> H <sub>4</sub> | 37.0   | 9                                | 0.03                              |           |
| -1.28                 | 0.1 M KCl               | C <sub>2</sub> H <sub>4</sub> | 42.0   | 4.2                              | 0.01                              | 20        |
| -1.58                 | 0.1 M KCl               | C <sub>2</sub> H <sub>4</sub> | 20.0   | 6.6                              | 0.03                              |           |
| -1.20                 | 0.2 M KCl               | C <sub>2+</sub>               | 49.4   | 1.0                              | 0.002                             | 21        |
| -1.40                 | 0.2 M KCl               | C <sub>2+</sub>               | 33.0   | 1.0                              | 0.003                             |           |
| -0.81                 | 0.5 M KCl               | C <sub>2</sub> H <sub>4</sub> | 84.5   | 169                              | 0.2                               | 22        |
| -1.24                 | 2.0 M KCl               | C <sub>2+</sub>               | 57.9   | 92                               | 0.2                               | 23        |
| -1.20                 | 3.0 M KCl               | C <sub>2+</sub>               | 82.7   | 97                               | 0.1                               |           |

\* 3.5 M KCl as catholyte, and 3.5 M KOH as anolyte.

**Table S3** The amount of dissolved Cu in the electrolyte during eCO<sub>2</sub>RR over activated Cu HF is quantified by ICP-OES.

| Reaction time                      | Dissolved Cu |
|------------------------------------|--------------|
| 0-10 min (OCP)                     | N.D.*        |
| 0-10 min (0.1 A cm <sup>-2</sup> ) | N.D.         |
| 0-10 min (1.0 A cm <sup>-2</sup> ) | N.D.         |
| 1.0 h (stability test)             | N.D.         |
| 10 h (stability test)              | N.D.         |
| 20 h (stability test)              | N.D.         |
| 30 h (stability test)              | N.D.         |

\*N.D. — not detected

**Table S4** Electrocatalytic performances for CO<sub>2</sub> to C<sub>2+</sub> products over the prominent catalysts reported with different electrode types.

| Catalyst                     | Potential (V vs. RHE) | Electrode Type     | Electrolyte                                 | FE <sub>C2+</sub> (%) | <i>j</i> <sub>C2+</sub> (mA cm <sup>-2</sup> ) | Ref.      |
|------------------------------|-----------------------|--------------------|---------------------------------------------|-----------------------|------------------------------------------------|-----------|
| activated Cu HF              | -1.07                 | Hollow-fiber GPEs* | 0.5 M KHCO <sub>3</sub>                     | 34.86                 | 225                                            | This work |
| activated Cu HF              | -1.32                 | Hollow-fiber GPEs  | 0.5 M KHCO <sub>3</sub>                     | 44.18                 | 628                                            |           |
| activated Cu HF              | -1.94                 | Hollow-fiber GPEs  | 0.5 M KHCO <sub>3</sub>                     | 62.75                 | 1442                                           |           |
| activated Cu HF              | -0.70                 | Hollow-fiber GPEs  | 3.5 M KCl                                   | 27.9                  | 139                                            | This work |
| activated Cu HF              | -0.84                 | Hollow-fiber GPEs  | 3.5 M KCl                                   | 47.5                  | 475                                            |           |
| activated Cu HF              | -0.95                 | Hollow-fiber GPEs  | 3.5 M KCl                                   | 64.8                  | 1296                                           |           |
| Cu <sub>2</sub> O derived Cu | -0.99                 | Planar electrode** | 0.1 M KHCO <sub>3</sub>                     | 48.7                  | 12.18                                          | 24        |
| Cu/CNS                       | -1.2                  | Planar electrode   | 0.1 M KHCO <sub>3</sub>                     | 63                    | 1.26                                           | 25        |
| Cu <sub>4</sub> Zn           | -1.05                 | Planar electrode   | 0.1 M KHCO <sub>3</sub>                     | 45.16                 | 3.71                                           | 26        |
| Plasma-Cu                    | -0.9                  | Planar electrode   | 0.1 M KHCO <sub>3</sub>                     | 60                    | 13.81                                          | 27        |
| Cu nanocubes                 | -1.1                  | Planar electrode   | 0.1 M KHCO <sub>3</sub>                     | 47.6                  | 1.90                                           | 28        |
| Au/Cu                        | -0.97                 | Planar electrode   | 0.1 M KHCO <sub>3</sub>                     | 22.7                  | 1.86                                           | 29        |
| (100) Cu NBs                 | -0.96                 | Planar electrode   | 0.25 M KHCO <sub>3</sub>                    | 60.5                  | 41.14                                          | 30        |
| B-doped Cu                   | -1.1                  | Planar electrode   | 0.1 M KCl                                   | 79                    | 55.3                                           | 17        |
| Cu NAs                       | -1.1                  | Planar electrode   | 0.1 M KClO <sub>4</sub>                     | 29                    | 1.31                                           | 31        |
| Cu foil                      | -0.83                 | Planar electrode   | 0.1 M KHCO <sub>3</sub><br>+ 0.3 M KI       | 28                    | 1.26                                           | 32        |
| Cu-12                        | -0.83                 | Membrane-GDEs***   | 0.1 M KHCO <sub>3</sub>                     | 72                    | 231.84                                         | 8         |
| Dendritic Cu                 | -1.2                  | Membrane-GDEs      | 0.1 M KHCO <sub>3</sub>                     | 36                    | 162                                            | 9         |
| N-C-Cu                       | -0.68                 | Membrane-GDEs      | 1.0 M KOH                                   | 92.1                  | 276.3                                          | 33        |
| Cu <sub>2</sub> S-Cu-V       | -0.92                 | Membrane-GDEs      | 1.0 M KOH                                   | 32                    | 126.08                                         | 34        |
| F-Cu                         | -0.89                 | Membrane-GDEs      | 0.75 M KOH                                  | 80                    | 1280                                           | 11        |
| Cu <sub>3</sub> Nx           | -1.15                 | Membrane-GDEs      | 1.0 M KOH                                   | 81.7                  | 307.19                                         | 35        |
| Cu(OH) <sub>2</sub> -D       | -0.54                 | Membrane-GDEs      | 1.0 M KOH                                   | 87                    | 217.5                                          | 10        |
| Cu nanoparticle              | -0.58                 | Membrane-GDEs      | 1.0 M KOH                                   | 46                    | 197.8                                          | 36        |
| Porous Cu                    | -0.67                 | Membrane-GDEs      | 1.0 M KOH                                   | 61.9                  | 404.21                                         | 37        |
| CuAg-wire                    | -0.7                  | Membrane-GDEs      | 1.0 M KOH                                   | 85                    | 255                                            | 38        |
| CIPH                         | -0.91                 | Membrane-GDEs      | 7.0 M KOH                                   | 78.2                  | 1212                                           | 16        |
| C/Cu/PTFE                    | -0.55                 | Membrane-GDEs      | 3.5 M KOH                                   | 63                    | 472.5                                          | 15        |
| Cu-CO <sub>2</sub> -60       | -0.69                 | Membrane-GDEs      | 8.0 M KOH                                   | 90                    | 520.2                                          | 39        |
| Cu nanoparticle              | -0.85                 | Membrane-GDEs      | 10 M KOH                                    | 18                    | 54                                             | 40        |
| Cu/PFSA                      | -1.34                 | Membrane-GDEs      | 1 M H <sub>3</sub> PO <sub>4</sub> +3 M KCl | 50                    | 600                                            | 41        |

\* Hollow-fiber GPEs — CO<sub>2</sub> forces penetration through the hollow fiber wall into the electrolyte and forces interaction with the active site.

\*\* Planar electrode — Electrodes immersed in the electrolyte use CO<sub>2</sub> dissolved in the electrolyte as the reactant.

\*\*\* Membrane-GDEs — CO<sub>2</sub> diffuses through the membrane to the catalyst layer and reacts with CO<sub>2</sub> gas near the membrane electrode.

**Table S5** Cell voltages of the prominent electrocatalysts reported with 2-electrode system.

| Electrolyte                                                                 | Product                       | Cell voltage (V) | $j_{total}$ (A cm <sup>-2</sup> ) | Ref. |
|-----------------------------------------------------------------------------|-------------------------------|------------------|-----------------------------------|------|
| CO <sub>2</sub> +H <sub>2</sub> O                                           | C <sub>2</sub> H <sub>4</sub> | 5.7              | 0.05                              | 42   |
| CO <sub>2</sub> +H <sub>2</sub> O                                           | C <sub>2</sub> H <sub>4</sub> | 5.0              | 0.40                              |      |
| 0.1 M KHCO <sub>3</sub>                                                     | C <sub>2+</sub>               | 5.6              | 0.015                             | 43   |
| 0.3 M Bu <sub>4</sub> NClO <sub>4</sub> /PC                                 | CO                            | 5.2              | 0.013                             | 44   |
| 0.1 M CsHCO <sub>3</sub>                                                    | CO                            | 5.0              | 0.20                              | 45   |
| CO <sub>2</sub> +H <sub>2</sub> O                                           | C <sub>2+</sub>               | 5.0              | 0.25                              | 46   |
| 7 M KOH                                                                     | C <sub>2+</sub>               | 4.5              | 1.42                              | 16   |
| CO <sub>2</sub> +H <sub>2</sub> O                                           | CH <sub>4</sub>               | 4.4              | 0.70                              | 47   |
| 1 M KOH                                                                     | C <sub>2+</sub>               | 4.3              | 0.40                              | 48   |
| 7 M KOH                                                                     | C <sub>2+</sub>               | 4.3              | 0.80                              | 39   |
| 0.01 M H <sub>2</sub> SO <sub>4</sub>                                       | C <sub>2+</sub>               | 4.3              | 0.24                              | 49   |
| 1 M H <sub>3</sub> PO <sub>4</sub> +3 M KCl                                 | C <sub>2+</sub>               | 4.2              | 1.200                             | 41   |
| CO <sub>2</sub> +H <sub>2</sub> O                                           | C <sub>2</sub> H <sub>4</sub> | 3.9              | 0.18                              | 8    |
| 1 M KOH                                                                     | C <sub>2+</sub>               | 3.5              | 0.72                              | 50   |
| 0.5 M NaHCO <sub>3</sub>                                                    | CO                            | 3.4              | 0.22                              | 51   |
| 0.5 M KHCO <sub>3</sub>                                                     | CO                            | 4.5              | 3.37                              | 52   |
| 0.1 M KHCO <sub>3</sub>                                                     | C <sub>2+</sub>               | 3.4              | 0.50                              | 53   |
| 0.5 M KHCO <sub>3</sub>                                                     | C <sub>2</sub> H <sub>4</sub> | 3.2              | 0.20                              | 22   |
| 0.01 M H <sub>2</sub> SO <sub>4</sub>                                       | C <sub>2+</sub>               | 3.8              | 0.09                              | 54   |
| 0.1 M H <sub>2</sub> SO <sub>4</sub> + 0.4 M K <sub>2</sub> SO <sub>4</sub> | C <sub>2+</sub>               | 3.2              | 0.20                              | 55   |
| 2.5 M KOH                                                                   | C <sub>2+</sub>               | 2.8              | 0.23                              | 11   |
| CO <sub>2</sub> +H <sub>2</sub> O                                           | CO                            | 2.7              | 0.14                              | 56   |

**Table S6** Different theoretical limits ( $j_{product,limit(gas)}$  and  $j_{product,limit(sol)}$ ) and  $j_{CO2RR}$  values over activated Cu HF were obtained at different CO<sub>2</sub> flow rates.

| $j$ (A cm <sup>-2</sup> )                      |     | CO <sub>2</sub> flow rate (ml min <sup>-1</sup> ) |       |       |       |       |
|------------------------------------------------|-----|---------------------------------------------------|-------|-------|-------|-------|
|                                                |     | 5                                                 | 10    | 20    | 30    | 40    |
| theoretica                                     | n=2 | 2.15                                              | 4.31  | 8.61  | 12.92 | 17.22 |
| $j_{product,limit(gas)}$ (A cm <sup>-2</sup> ) | n=6 | 6.46                                              | 12.92 | 25.84 | 38.76 | 51.68 |
| theoretical                                    | n=2 | 0.09                                              | 0.09  | 0.09  | 0.09  | 0.09  |
| $j_{product,limit(sol)}$ (A cm <sup>-2</sup> ) | n=6 | 0.26                                              | 0.26  | 0.26  | 0.26  | 0.26  |
| experimental $j_{CO2RR}$ (A cm <sup>-2</sup> ) |     | 1.09                                              | 1.41  | 1.49  | 1.37  | 1.32  |

All gas-phase CO<sub>2</sub> molecules input into the electrolysis cell were reduced with a 100% conversion rate, i.e.,  $j_{product,limit(gas)}$ , and all CO<sub>2</sub> molecules dissolved in the electrolyte solution were reduced, i.e.,  $j_{product,limit(sol)}$ .

The theoretical limits of C<sub>2+</sub> products partial current density, i.e.,  $j_{C2+,lim(gas)}$  was calculated by the following Equation:

$$j_{limit(gas)} = (n \times F \times v_{CO_2}) / (S_{HF} \times V_m)$$

where  $n$  is the number of moles of electrons transferred in the half-reaction.  $F$  is the Faraday constant, 96485 C mol<sup>-1</sup>.  $S_{HF}$  is the electrode area,  $v_{CO_2}$  is the flow rate of CO<sub>2</sub>, and  $V_m$  is the gas mole volume (24.5 L mol<sup>-1</sup> at 25 °C, 101.325 kPa).

Based on the semi-infinite diffusion model, the current density under the mass transport limit can be evaluated using the following equation:

$$j_{limit(sol)} = n \times F \times D \times c / \delta$$

where  $D$  is the diffusion coefficient of CO<sub>2</sub>,  $2 \times 10^{-5}$  cm<sup>2</sup> s<sup>-1</sup>.  $c$  represents the saturated bulk concentration of CO<sub>2</sub>, and the solubility of CO<sub>2</sub> in the diluted aqueous electrolyte at 1atm is 34 mM.  $\delta$  is the diffusion layer thickness for CO<sub>2</sub>.



**Table S7** Double-layer capacitance and Pb UPD results obtained by cyclic voltammetry.

| Electrode         | Double layer capacitance<br>(mF cm <sup>-2</sup> ) | Ratio of activated<br>Cu HF/ Cu HF | Pb UPD<br>(mC) | Ratio of activated<br>Cu HF/ Cu HF |
|-------------------|----------------------------------------------------|------------------------------------|----------------|------------------------------------|
| Cu HF             | 10.74                                              |                                    | 3.12           |                                    |
| activated Cu HF   | 34.57                                              | 3.22                               | 10.56          | 3.38                               |
| Cu foil           | 4.77                                               | /                                  | /              | /                                  |
| activated Cu foil | 20.99                                              | /                                  | /              | /                                  |

**Table S8** Adsorption energies of three intermediates (CO\*, OCCO\*, and OCCOH\*) in CO<sub>2</sub> reduction on Cu(111), Cu(110), Cu(100). All energies are expressed in eV.

|        | Cu(111) | Cu(110) | Cu(100) |
|--------|---------|---------|---------|
| CO*    | 0 eV    | 0 eV    | 0 eV    |
| OCCO*  | 1.14 eV | 0.85 eV | 0.74 eV |
| OCCOH* | 1.00 eV | 0.71 eV | 0.49 eV |

## References

- (1) L. Wang, S. Nitopi, A. B. Wong, J. L. Snider, A. C. Nielander, C. G. Morales-Guio, M. Orazov, D. C. Higgins, C. Hahn and T. F. Jaramillo, *Nat. Catal.*, 2019, **2**, 702-708.
- (2) F. Calle-Vallejo and M. T. Koper, *Angew. Chem., Int. Ed.*, 2013, **52**, 7282-7285.
- (3) W. Zhang, C. Huang, Q. Xiao, L. Yu, L. Shuai, P. An, J. Zhang, M. Qiu, Z. Ren and Y. Yu, *J. Am. Chem. Soc.*, 2020, **142**, 11417-11427.
- (4) H. Wu, J. Li, K. Qi, Y. Zhang, E. Petit, W. Wang, V. Flaud, N. Onofrio, B. Rebiere, L. Huang, C. Salameh, L. Lajaunie, P. Miele and D. Voiry, *Nat. Commun.*, 2021, **12**, 7210.
- (5) Z. Lyu, S. Zhu, L. Xu, Z. Chen, Y. Zhang, M. Xie, T. Li, S. Zhou, J. Liu, M. Chi, M. Shao, M. Mavrikakis and Y. Xia, *J. Am. Chem. Soc.*, 2021, **143**, 149-162.
- (6) P. Shao, W. Zhou, Q. L. Hong, L. Yi, L. Zheng, W. Wang, H. X. Zhang, H. Zhang and J. Zhang, *Angew. Chem. Int. Ed.*, 2021, **60**, 16687-16692.
- (7) J. Kim, W. Choi, J. W. Park, C. Kim, M. Kim and H. Song, *J. Am. Chem. Soc.*, 2019, **141**, 6986-6994.
- (8) F. Li, A. Thevenon, A. Rosas-Hernandez, Z. Wang, Y. Li, C. M. Gabardo, A. Ozden, C. T. Dinh, J. Li, Y. Wang, J. P. Edwards, Y. Xu, C. McCallum, L. Tao, Z. Q. Liang, M. Luo, X. Wang, H. Li, C. P. O'Brien, C. S. Tan, D. H. Nam, R. Quintero-Bermudez, T. T. Zhuang, Y. C. Li, Z. Han, R. D. Britt, D. Sinton, T. Agapie, J. C. Peters and E. H. Sargent, *Nature*, 2020, **577**, 509-513.
- (9) P. De Luna, R. Quintero-Bermudez, C.-T. Dinh, M. B. Ross, O. S. Bushuyev, P. Todorović, T. Regier, S. O. Kelley, P. Yang and E. H. Sargent, *Nat. Catal.*, 2018, **1**, 103-110.
- (10) D. Zhong, Z. J. Zhao, Q. Zhao, D. Cheng, B. Liu, G. Zhang, W. Deng, H. Dong, L. Zhang, J. Li, J. Li and J. Gong, *Angew. Chem. Int. Ed.*, 2021, **60**, 4879-4885.
- (11) W. Ma, S. Xie, T. Liu, Q. Fan, J. Ye, F. Sun, Z. Jiang, Q. Zhang, J. Cheng and Y. Wang, *Nat. Catal.*, 2020, **3**, 478-487.
- (12) X. Chen, J. Chen, N. M. Alghoraibi, D. A. Henckel, R. Zhang, U. O. Nwabara, K. E. Madsen, P. J. A. Kenis, S. C. Zimmerman and A. A. Gewirth, *Nat. Catal.*, 2020, **4**, 20-27.
- (13) H. Li, T. Liu, P. Wei, L. Lin, D. Gao, G. Wang and X. Bao, *Angew. Chem. Int. Ed.*, 2021, **60**, 14329-14333.

- (14) M. Zheng, P. Wang, X. Zhi, K. Yang, Y. Jiao, J. Duan, Y. Zheng and S. Z. Qiao, *J. Am. Chem. Soc.*, 2022, **144**, 14936-14944.
- (15) C. T. Dinh, T. Burdyny, M. G. Kibria, A. Seifitokaldani, C. M. Gabardo, F. P. G. de Arquer, A. Kiani, J. P. Edwards, P. De Luna, O. S. Bushuyev, C. Q. Zou, R. Quintero-Bermudez, Y. J. Pang, D. Sinton and E. H. Sargent, *Science*, 2018, **360**, 783-787.
- (16) F. P. G. de Arquer, C. T. Dinh, A. Ozden, J. Wicks, C. McCallum, A. R. Kirmani, D. H. Nam, C. Gabardo, A. Seifitokaldani, X. Wang, Y. G. C. Li, F. W. Li, J. Edwards, L. J. Richter, S. J. Thorpe, D. Sinton and E. H. Sargent, *Science*, 2020, **367**, 661-666.
- (17) Y. Zhou, F. Che, M. Liu, C. Zou, Z. Liang, P. De Luna, H. Yuan, J. Li, Z. Wang, H. Xie, H. Li, P. Chen, E. Bladt, R. Quintero-Bermudez, T. K. Sham, S. Bals, J. Hofkens, D. Sinton, G. Chen and E. H. Sargent, *Nat. Chem.*, 2018, **10**, 974-980.
- (18) J. Y. Kim, G. Kim, H. Won, I. Gereige, W. B. Jung and H. T. Jung, *Adv. Mater.*, 2022, **34**, e2106028.
- (19) R. Feng, Q. Zhu, M. Chu, S. Jia, J. Zhai, H. Wu, P. Wu and B. Han, *Green Chem.*, 2020, **22**, 7560-7565.
- (20) M. Balamurugan, H. Y. Jeong, V. S. K. Choutipalli, J. S. Hong, H. Seo, N. Saravanan, J. H. Jang, K. G. Lee, Y. H. Lee, S. W. Im, V. Subramanian, S. H. Kim and K. T. Nam, *Small*, 2020, **16**, e2000955.
- (21) S. Lee, G. Park and J. Lee, *ACS Catal.*, 2017, **7**, 8594-8604.
- (22) W. Liu, P. Zhai, A. Li, B. Wei, K. Si, Y. Wei, X. Wang, G. Zhu, Q. Chen, X. Gu, R. Zhang, W. Zhou and Y. Gong, *Nat. Commun.*, 2022, **13**, 1877.
- (23) X. Zhang, J. Li, Y. Y. Li, Y. Jung, Y. Kuang, G. Zhu, Y. Liang and H. Dai, *J. Am. Chem. Soc.*, 2021, **143**, 3245-3255.
- (24) D. Ren, Y. Deng, A. D. Handoko, C. S. Chen, S. Malkhandi and B. S. Yeo, *ACS Catal.*, 2015, **5**, 2814-2821.
- (25) Y. Song, R. Peng, D. K. Hensley, P. V. Bonnesen, L. Liang, Z. Wu, H. M. Meyer, M. Chi, C. Ma, B. G. Sumpter and A. J. Rondinone, *ChemistrySelect*, 2016, **1**, 6055-6061.
- (26) D. Ren, B. S.-H. Ang and B. S. Yeo, *ACS Catal.*, 2016, **6**, 8239-8247.
- (27) H. Mistry, A. S. Varela, C. S. Bonifacio, I. Zegkinoglou, I. Sinev, Y. W. Choi, K. Kisslinger, E. A. Stach, J. C. Yang, P. Strasser and B. R. Cuenya, *Nat. Commun.*, 2016, **7**, 12123.

- (28) A. Loiudice, P. Lobaccaro, E. A. Kamali, T. Thao, B. H. Huang, J. W. Ager and R. Buonsanti, *Angew. Chem. Int. Ed.*, 2016, **55**, 5789-5792.
- (29) C. G. Morales-Guio, E. R. Cave, S. A. Nitopi, J. T. Feaster, L. Wang, K. P. Kuhl, A. Jackson, N. C. Johnson, D. N. Abram, T. Hatsukade, C. Hahn and T. F. Jaramillo, *Nat. Catal.*, 2018, **1**, 764-771.
- (30) K. Jiang, R. B. Sandberg, A. J. Akey, X. Liu, D. C. Bell, J. K. Nørskov, K. Chan and H. Wang, *Nat. Catal.*, 2018, **1**, 111-119.
- (31) M. Ma, K. Djanashvili and W. A. Smith, *Angew. Chem. Int. Ed.*, 2016, **55**, 6680-6684.
- (32) A. S. Varela, W. Ju, T. Reier and P. Strasser, *ACS Catal.*, 2016, **6**, 2136-2144.
- (33) X. Wang, Z. Wang, F. P. García de Arquer, C.-T. Dinh, A. Ozden, Y. C. Li, D.-H. Nam, J. Li, Y.-S. Liu, J. Wicks, Z. Chen, M. Chi, B. Chen, Y. Wang, J. Tam, J. Y. Howe, A. Proppe, P. Todorović, F. Li, T.-T. Zhuang, C. M. Gabardo, A. R. Kirmani, C. McCallum, S.-F. Hung, Y. Lum, M. Luo, Y. Min, A. Xu, C. P. O'Brien, B. Stephen, B. Sun, A. H. Ip, L. J. Richter, S. O. Kelley, D. Sinton and E. H. Sargent, *Nat. Energy*, 2020, **5**, 478-486.
- (34) T.-T. Zhuang, Z.-Q. Liang, A. Seifitokaldani, Y. Li, P. De Luna, T. Burdyny, F. Che, F. Meng, Y. Min, R. Quintero-Bermudez, C. T. Dinh, Y. Pang, M. Zhong, B. Zhang, J. Li, P.-N. Chen, X.-L. Zheng, H. Liang, W.-N. Ge, B.-J. Ye, D. Sinton, S.-H. Yu and E. H. Sargent, *Nat. Catal.*, 2018, **1**, 421-428.
- (35) C. Peng, G. Luo, Z. Xu, S. Yan, J. Zhang, M. Chen, L. Qian, W. Wei, Q. Han and G. Zheng, *Adv. Mater.*, 2021, **33**, e2103150.
- (36) S. Ma, M. Sadakiyo, R. Luo, M. Heima, M. Yamauchi and P. J. A. Kenis, *J. Power Sources*, 2016, **301**, 219-228.
- (37) J. J. Lv, M. Jouny, W. Luc, W. Zhu, J. J. Zhu and F. Jiao, *Adv. Mater.*, 2018, **30**, e1803111.
- (38) T. T. H. Hoang, S. Verma, S. Ma, T. T. Fister, J. Timoshenko, A. I. Frenkel, P. J. A. Kenis and A. A. Gewirth, *J. Am. Chem. Soc.*, 2018, **140**, 5791-5797.
- (39) Y. Wang, Z. Wang, C.-T. Dinh, J. Li, A. Ozden, M. Golam Kibria, A. Seifitokaldani, C.-S. Tan, C. M. Gabardo, M. Luo, H. Zhou, F. Li, Y. Lum, C. McCallum, Y. Xu, M. Liu, A. Proppe, A. Johnston, P. Todorovic, T.-T. Zhuang, D. Sinton, S. O. Kelley and E. H. Sargent, *Nat. Catal.*, 2019, **3**, 98-106.
- (40) L. Han, W. Zhou and C. Xiang, *ACS Energy Lett.*, 2018, **3**, 855-860.

- (41) J. E. Huang, F. W. Li, A. Ozden, A. S. Rasouli, F. P. G. de Arquer, S. J. Liu, S. Z. Zhang, M. C. Luo, X. Wang, Y. W. Lum, Y. Xu, K. Bertens, R. K. Miao, C. T. Dinh, D. Sinton and E. H. Sargent, *Science*, 2021, **372**, 1074-1078.
- (42) C. P. O'Brien, R. K. Miao, S. Liu, Y. Xu, G. Lee, A. Robb, J. E. Huang, K. Xie, K. Bertens, C. M. Gabardo, J. P. Edwards, C.-T. Dinh, E. H. Sargent and D. Sinton, *ACS Energy Lett.*, 2021, **6**, 2952-2959.
- (43) M. Krödel, B. M. Carter, D. Rall, J. Lohaus, M. Wessling and D. J. Miller, *ACS Appl. Mater. Inter.*, 2020, **12**, 12030-12042.
- (44) T.-y. Chen, J. Hu, K.-z. Wang, G.-y. Gan and J. Shi, *Ionics*, 2021, **27**, 3639-3645.
- (45) A. Pătru, T. Binninger, B. Pribyl and T. J. Schmidt, *J. Electrochem. Soc.* 2019, **166**, F34-F43.
- (46) R. K. Miao, Y. Xu, A. Ozden, A. Robb, C. P. O'Brien, C. M. Gabardo, G. Lee, J. P. Edwards, J. E. Huang, M. Fan, X. Wang, S. Liu, Y. Yan, E. H. Sargent and D. Sinton, *Joule*, 2021, **5**, 2742-2753.
- (47) Y. Xu, F. Li, A. Xu, J. P. Edwards, S. F. Hung, C. M. Gabardo, C. P. O'Brien, S. Liu, X. Wang, Y. Li, J. Wicks, R. K. Miao, Y. Liu, J. Li, J. E. Huang, J. Abed, Y. Wang, E. H. Sargent and D. Sinton, *Nat. Commun.*, 2021, **12**, 2932.
- (48) Y. C. Li, G. Lee, T. Yuan, Y. Wang, D.-H. Nam, Z. Wang, F. P. García de Arquer, Y. Lum, C.-T. Dinh, O. Voznyy and E. H. Sargent, *ACS Energy Lett.*, 2019, **4**, 1427-1431.
- (49) Y. Xu, R. K. Miao, J. P. Edwards, S. Liu, C. P. O'Brien, C. M. Gabardo, M. Fan, J. E. Huang, A. Robb, E. H. Sargent and D. Sinton, *Joule*, 2022, **6**, 1333-1343.
- (50) Y. Xu, J. P. Edwards, J. Zhong, C. P. O'Brien, C. M. Gabardo, C. McCallum, J. Li, C.-T. Dinh, E. H. Sargent and D. Sinton, *Energ. Environ. Sci.*, 2020, **13**, 554-561.
- (51) W. Zhu, S. Kattel, F. Jiao and J. G. Chen, *Adv. Energy Mater.*, 2019, **9**, 1802840.
- (52) G. Wen, B. Ren, X. Wang, D. Luo, H. Dou, Y. Zheng, R. Gao, J. Gostick, A. Yu and Z. Chen, *Nature Energy*, 2022, **7**, 978-988.
- (53) W. Li, Z. Yin, Z. Gao, G. Wang, Z. Li, F. Wei, X. Wei, H. Peng, X. Hu, L. Xiao, J. Lu and L. Zhuang, *Nature Energy*, 2022, **7**, 835-843.
- (54) Y. Xu, R. K. Miao, J. P. Edwards, S. Liu, C. P. O'Brien, C. M. Gabardo, M. Fan, J. E. Huang, A. Robb, E. H. Sargent and D. Sinton, *Joule*, 2022, **6**, 1-11.
- (55) J. Gu, S. Liu, W. Ni, W. Ren, S. Haussener and X. Hu, *Nat. Catal.*, 2022, **5**, 268-276.

(56) T. Zheng, K. Jiang, N. Ta, Y. Hu, J. Zeng, J. Liu and H. Wang, *Joule*, 2019, **3**, 265-278.
